# Supplementary material for: Antibiotic Resistance, spa Typing and Clonal Analysis of Methicillin-Resistant Staphylococcus aureus (MRSA) Isolates from Blood of Patients Hospitalized in the Czech Republic
Source: MDPI journal article supplement (doi:10.3390/antibiotics10040395), 2021-04-06
Supplement: s1 [file s1]

Table S2: Primers used in the study.

| mecA/mecC detection                        |                   |                                |           |           |
|--------------------------------------------|-------------------|--------------------------------|-----------|-----------|
| Gene                                       | Primer pair       | Nucleotide Sequence (5'-3')    | Size [bp] | Reference |
| mecA                                       | MECA P4           | TCC AGA TTA CAA CTT CAC CAG G  | 162       | [42]      |
|                                            | MECA P7           | CCA CTT CAT ATC TTG TAA CG     |           |           |
| mecC                                       | mecALGA251MultiFP | GAA AAA AAG GCT TAG AAC GCC TC | 138       | [43]      |
|                                            | mecALGA251MultiRP | GAA GAT CTT TTC CGT TTT CAG C  |           |           |
| SCCmec typing                              |                   |                                |           |           |
| Primer specificity (SCCmec type, region)   | Primer pair       | Nucleotide Sequence (5'-3')    | Size [bp] | Reference |
| I, J1 region                               | CIF2 F2           | TTC GAG TTG CTG ATG AAG AAG G  | 495       | [47]      |
|                                            | CIF2 R2           | ATT TAC CAC AAG GAC TAC CAG C  |           |           |
| V, ccr complex                             | ccrC F2           | GTA CTC GTT ACA ATG TTT GG     | 449       |           |
|                                            | ccrC R2           | ATA ATG GCT TCA TGC TTA CC     |           |           |
| III, J3 region                             | RIF5 F10          | TTC TTA AGT ACA CGC TGA ATC G  | 414       |           |
|                                            | RIF5 R13          | GTC ACA GTA ATT CCA TCA ATG C  |           |           |
| V, J1 region                               | SCCmec V J1 F     | TTC TCC ATT CTT GTT CAT CC     | 377       |           |
|                                            | SCCmec V J1 R     | AGA GAC TAC TGA CTT AAG TGG    |           |           |
| I, II, IV, and VI, J3 region               | dcs F2            | CAT CCT ATG ATA GCT TGG TC     | 342       |           |
|                                            | dcs R1            | CTA AAT CAT AGC CAT GAC CG     |           |           |
| II and IV, ccr complex                     | ccrB2 F2          | AGT TTC TCA GAA TTC GAA CG     | 311       |           |
|                                            | ccrB2 R2          | CCG ATA TAG AAW GGG TTAG C     |           |           |
| II, J1 region                              | kdp F1            | AAT CAT CTG CCA TTG GTG ATG C  | 284       |           |
|                                            | kdp R1            | CGA ATG AAG TGA AAG AAA GTG G  |           |           |
| III, J1 region                             | SCCmec III J1 F   | CAT TTG TGA AAC ACA GTA CG     | 243       |           |
|                                            | SCCmec III J1 R   | GTT ATT GAG ACT CCT AAA GC     |           |           |
| II and III, mec complex                    | mecI P2           | ATC AAG ACT TGC ATT CAG GC     | 209       |           |
|                                            | mecI P3           | GCG GTT TCA ATT CAC TTG TC     |           |           |
| Internal positive control                  | mecA P4           | TCC AGA TTA CAA CTT CAC CAG G  | 162       |           |
|                                            | mecA P7           | CCA CTT CAT ATC TTG TAA CG     |           |           |
| II                                         | Type II-F         | CGT TGA AGA TGA TGA AGC G      | 398       | [48]      |
|                                            | Type II-R         | CGA AAT CAA TGG TTA ATG GAC C  |           |           |
| V                                          | Type V-F          | GAA CAT TGT TAC TTA AAT GAG CG | 325       |           |
|                                            | Type V-R          | TGA AAG TTG TAC CCT TGA CAC C  |           |           |
| Multilocus sequence typing                 |                   |                                |           |           |
| Gene                                       | Primer pair       | Nucleotide Sequence (5'-3')    | Reference |           |
| Carbamate kinase (arcC)                    | arcC-Up           | TTG ATT CAC CAG CGC GTA TTG TC | [46]      |           |
|                                            | arcC-Dn           | AGG TAT CTG CTT CAA TCA GCG    |           |           |
| Shikimate dehydrogenase (aroE)             | aroE-Up           | ATC GGA AAT CCT ATT TCA CAT TC |           |           |
|                                            | aroE-Dn           | GGT GTT GTA TTA ATA ACG ATA TC |           |           |
| Glycerol kinase (glpF)                     | glpF-Up           | CTA GGA ACT GCA ATC TTA ATC C  |           |           |
|                                            | glpF-Dn           | TGG TAA AAT CGC ATG TCC AAT TC |           |           |
| Guanylate kinase (gmk)                     | gmk-Up            | ATC GTT TTA TCG GGA CCA TC     |           |           |
|                                            | gmk-Dn            | TCA TTA ACT ACA ACG TAA TCG TA |           |           |
| Phosphate acetyltransferase (pta)          | pta-Up            | GTT AAA ATC GTA TTA CCT GAA GG |           |           |
|                                            | pta-Dn            | GAC CCT TTT GTT GAA AAG CTT AA |           |           |
| Triosephosphate isomerase (tpi)            | tpi-Up            | TCG TTC ATT CTG AAC GTC GTG AA |           |           |
|                                            | tpi-Dn            | TTT GCA CCT TCT AAC AAT TGT AC |           |           |
| Acetyl coenzyme A acetyltransferase (yqiL) | yqiL-Up           | CAG CAT ACA GGA CAC CTA TTG GC |           |           |
|                                            | yqiL-Dn           | CGT TGA GGA ATC GAT ACT GGA AC |           |           |

| <i>spa</i> typing              |             |                               |           |
|--------------------------------|-------------|-------------------------------|-----------|
| Primer specificity             | Primer pair | Nucleotide Sequence (5'-3')   | Reference |
| Staphylococcus protein         | spa-1113f   | TAA AGA CGA TCC TTC GGT GAG C | [44]      |
| A ( <i>spa</i> ) repeat region | spa-1514r   | CAG CAG TAG TGC CGT TTG CTT   |           |
