# Supplementary material for: Antibiotic Resistance, spa Typing and Clonal Analysis of Methicillin-Resistant Staphylococcus aureus (MRSA) Isolates from Blood of Patients Hospitalized in the Czech Republic
Source: MDPI journal article supplement (doi:10.3390/antibiotics10040395), 2021-04-06
Supplement: s1 [file s1]

Table S1: The characteristics of the 618 MRSA isolates from blood of patients hospitalized in the Czech Republic (2016-2018).

| Strain   | Age | Sex | Year | Region           | MIC [mg/l] |     |     |      |      |       |        |       |      |       | [mm] |     |     | spa type | spa cluster | spa CC | MLST ST | MLST CC | SCCmec type |     |
|----------|-----|-----|------|------------------|------------|-----|-----|------|------|-------|--------|-------|------|-------|------|-----|-----|----------|-------------|--------|---------|---------|-------------|-----|
|          |     |     |      |                  | TGC        | LNZ | CMP | CIP  | GEN  | SXT   | RIF    | FUS   | ERY  | CLI   | VAN  | FOX | TET |          |             |        |         |         |             | CPT |
| B0032680 | 83  | M   | 2016 | Prague           | 0.06       | 2   | 8   | >16  | 0.25 | 0.06  | ≤0.016 | 0.06  | >8   | 0.125 | 1    | 6   | 27  | 17       | t002        | 1      | 003     | -       | CC5         | -   |
| B0032732 | 61  | M   | 2016 | Prague           | 0.125      | 2   | 8   | >16  | 0.25 | 0.125 | ≤0.016 | 0.125 | >8   | >4    | 1    | 6   | 25  | 19       | t003        | 1      | 003     | -       | CC5         | -   |
| B0032812 | 59  | F   | 2016 | Prague           | 0.06       | 2   | 8   | 0.25 | 0.25 | ≤0.03 | ≤0.016 | 0.125 | 0.25 | 0.125 | 1    | 15  | 26  | 21       | t026        | E      | E       | 45      | CC45        | IV  |
| B0032906 | 73  | F   | 2016 | Pardubice        | 0.125      | 2   | 8   | >16  | 0.5  | 0.06  | ≤0.016 | 0.125 | >8   | >4    | 1    | 6   | 31  | 20       | t564        | 1      | 003     | -       | CC5         | -   |
| B0032911 | 84  | F   | 2016 | Hradec Kralove   | 0.125      | 2   | 8   | >16  | 0.5  | 0.06  | ≤0.016 | 0.125 | >8   | >4    | 1    | 6   | 26  | 20       | t003        | 1      | 003     | -       | CC5         | -   |
| B0032956 | 68  | M   | 2016 | South Moravian   | 0.125      | 2   | 8   | >16  | 0.5  | 0.06  | ≤0.016 | 0.06  | >8   | >4    | 1    | 6   | 26  | 18       | t003        | 1      | 003     | -       | CC5         | -   |
| B0032983 | 73  | M   | 2016 | Prague           | 0.06       | 2   | 8   | 0.5  | 0.5  | 0.06  | ≤0.016 | 0.06  | >8   | 0.125 | 1    | 11  | 26  | 23       | t008        | 4      | 024     | -       | CC8         | -   |
| B0032986 | 76  | F   | 2016 | Prague           | 0.125      | 2   | 8   | >16  | 0.5  | 0.06  | ≤0.016 | 0.125 | >8   | >4    | 1    | 6   | 30  | 20       | t586        | E      | E       | -       | CC5         | -   |
| B0033004 | 74  | F   | 2016 | Prague           | 0.125      | 2   | 8   | >16  | 0.5  | 0.06  | ≤0.016 | 0.25  | >8   | >4    | 1    | 6   | 26  | 21       | t003        | 1      | 003     | -       | CC5         | -   |
| B0033046 | 37  | M   | 2016 | Zlin             | 0.125      | 2   | 8   | >16  | 0.5  | 0.06  | ≤0.016 | 0.125 | >8   | >4    | 1    | 6   | 26  | 21       | t003        | 1      | 003     | -       | CC5         | -   |
| B0033069 | 70  | M   | 2016 | Usti nad Labem   | 0.06       | 1   | 4   | >16  | 1    | 0.06  | ≤0.016 | 0.125 | >8   | >4    | 1    | 16  | 30  | 23       | t014        | 1      | 003     | -       | CC5         | -   |
| B0033072 | 80  | M   | 2016 | Prague           | 0.125      | 2   | >64 | >16  | 0.5  | 0.06  | ≤0.016 | 0.125 | >8   | >4    | 1    | 6   | 30  | 18       | t014        | 1      | 003     | -       | CC5         | -   |
| B0033106 | 73  | M   | 2016 | Prague           | 0.125      | 2   | 8   | >16  | 0.5  | 0.06  | ≤0.016 | 0.125 | >8   | >4    | 1    | 6   | 26  | 17       | t003        | 1      | 003     | -       | CC5         | -   |
| B0033181 | 90  | F   | 2016 | South Bohemian   | 0.125      | 2   | 8   | >16  | 0.5  | 0.06  | ≤0.016 | 0.125 | >8   | >4    | 1    | 6   | 26  | 20       | t003        | 1      | 003     | -       | CC5         | -   |
| B0033199 | 98  | M   | 2016 | Pilsen           | 0.125      | 2   | 16  | >16  | 0.5  | 0.06  | ≤0.016 | 0.125 | >8   | >4    | 2    | 6   | 26  | 20       | t003        | 1      | 003     | -       | CC5         | -   |
| B0033212 | 68  | M   | 2016 | Prague           | 0.125      | 2   | 8   | >16  | >16  | 0.06  | ≤0.016 | 0.125 | >8   | >4    | 1    | 6   | 30  | 21       | t014        | 1      | 003     | -       | CC5         | -   |
| B0033289 | 77  | F   | 2016 | Pilsen           | 0.125      | 2   | 8   | >16  | 0.25 | ≤0.03 | ≤0.016 | 0.06  | >8   | >4    | 1    | 6   | 28  | 22       | t003        | 1      | 003     | -       | CC5         | -   |
| B0033326 | 51  | M   | 2016 | Prague           | 0.125      | 2   | 8   | >16  | 0.5  | 0.125 | ≤0.016 | 0.06  | >8   | >4    | 1    | 6   | 28  | 19       | t014        | 1      | 003     | -       | CC5         | -   |
| B0033338 | 67  | F   | 2016 | South Bohemian   | 0.06       | 1   | 8   | >16  | 16   | 0.06  | ≤0.016 | ≤0.03 | >8   | >4    | 1    | 6   | 31  | 21       | nt          | -      | -       | -       | -           | -   |
| B0033369 | 74  | M   | 2016 | Pilsen           | 0.06       | 2   | 8   | >16  | 0.5  | 0.06  | ≤0.016 | 0.125 | >8   | >4    | 1    | 6   | 25  | 19       | t014        | 1      | 003     | -       | CC5         | -   |
| B0033371 | 72  | M   | 2016 | Hradec Kralove   | 0.125      | 2   | 8   | 0.5  | 0.5  | >4    | ≤0.016 | 0.06  | 0.25 | 0.125 | 1    | 6   | 26  | 20       | t437        | S      | S       | -       | CC59        | -   |
| B0033382 | 79  | M   | 2016 | South Moravian   | 0.06       | 1   | 4   | >16  | 0.5  | 0.06  | ≤0.016 | 0.06  | >8   | >4    | 1    | 6   | 27  | 19       | t003        | 1      | 003     | -       | CC5         | -   |
| B0033389 | 84  | M   | 2016 | Prague           | 0.125      | 2   | 8   | >16  | 0.5  | ≤0.03 | ≤0.016 | 0.06  | >8   | >4    | 1    | 6   | 26  | 19       | t003        | 1      | 003     | -       | CC5         | -   |
| B0033428 | 78  | M   | 2016 | Pilsen           | 0.125      | 2   | 8   | >16  | 0.5  | 0.06  | ≤0.016 | 0.06  | >8   | >4    | 1    | 6   | 26  | 20       | t003        | 1      | 003     | -       | CC5         | -   |
| B0033429 | 14  | F   | 2016 | Pilsen           | 0.06       | 2   | 8   | 0.5  | 0.5  | 0.06  | ≤0.016 | 0.125 | >8   | 0.25  | 1    | 14  | 25  | 23       | t330        | S      | S       | 45      | CC45        | IV  |
| B0033456 | 52  | M   | 2016 | Prague           | 0.125      | 2   | 8   | >16  | 0.5  | ≤0.03 | ≤0.016 | 0.06  | >8   | >4    | 1    | 6   | 26  | 20       | t003        | 1      | 003     | -       | CC5         | -   |
| B0033492 | 69  | M   | 2016 | Karlovy Vary     | 0.06       | 2   | 8   | >16  | 0.5  | 0.125 | ≤0.016 | 0.125 | >8   | >4    | 1    | 6   | 28  | 23       | t003        | 1      | 003     | -       | CC5         | -   |
| B0033532 | 0   | M   | 2016 | South Moravian   | 0.125      | 2   | 8   | 2    | 1    | 0.06  | ≤0.016 | 0.125 | >8   | 0.25  | 2    | 11  | 14  | 22       | t665        | S      | S       | 1472    | CC30        | IV  |
| B0033533 | 65  | M   | 2016 | South Moravian   | 0.06       | 2   | 8   | >16  | 0.5  | ≤0.03 | ≤0.016 | 0.06  | >8   | >4    | 1    | 6   | 27  | 17       | t627        | 1      | 003     | -       | CC5         | -   |
| B0033535 | 64  | M   | 2016 | South Moravian   | 0.06       | 2   | 8   | >16  | 0.25 | 0.06  | ≤0.016 | 0.06  | >8   | >4    | 1    | 6   | 24  | 18       | t003        | 1      | 003     | -       | CC5         | -   |
| B0033574 | 79  | M   | 2016 | Prague           | 0.06       | 2   | 8   | >16  | 0.5  | 0.06  | ≤0.016 | 0.125 | >8   | >4    | 1    | 6   | 27  | 18       | t014        | 1      | 003     | -       | CC5         | -   |
| B0033576 | 64  | F   | 2016 | Prague           | 0.125      | 2   | 64  | >16  | 0.25 | 0.06  | ≤0.016 | 0.125 | >8   | >4    | 1    | 6   | 27  | 19       | t014        | 1      | 003     | -       | CC5         | -   |
| B0033620 | 53  | M   | 2016 | Central Bohemian | 0.125      | 2   | 8   | >16  | 0.25 | 0.06  | ≤0.016 | 0.125 | >8   | >4    | 1    | 8   | 26  | 20       | t564        | 1      | 003     | -       | CC5         | -   |
| B0033674 | 54  | F   | 2016 | Prague           | 0.125      | 2   | 8   | >16  | 0.25 | ≤0.03 | ≤0.016 | 0.125 | >8   | >4    | 2    | 6   | 30  | 20       | t586        | E      | E       | -       | CC5         | -   |
| B0033722 | 74  | M   | 2016 | Pilsen           | 0.125      | 2   | 8   | >16  | 0.5  | ≤0.03 | ≤0.016 | 0.06  | >8   | >4    | 1    | 6   | 27  | 19       | t1226       | 1      | 003     | -       | CC5         | -   |

|          |    |   |      |                  |       |     |     |      |      |        |        |       |     |              |   |    |    |    |       |   |      |     |       |    |
|----------|----|---|------|------------------|-------|-----|-----|------|------|--------|--------|-------|-----|--------------|---|----|----|----|-------|---|------|-----|-------|----|
| B0033745 | 81 | F | 2016 | Pardubice        | 0.06  | 2   | 8   | >16  | 1    | 0.06   | ≤0.016 | 0.06  | >8  | <b>0.25</b>  | 2 | 6  | 28 | 19 | t014  | 1 | 003  | -   | CC5   | -  |
| B0033746 | 71 | M | 2016 | Pardubice        | 0.125 | 2   | 8   | >16  | 0.5  | 0.06   | 0.125  | 0.06  | >8  | <b>0.25</b>  | 2 | 6  | 28 | 18 | t2164 | 1 | 003  | -   | CC5   | -  |
| B0033841 | 88 | M | 2016 | Pilsen           | 0.125 | 2   | 8   | >16  | 0.25 | 0.06   | ≤0.016 | 0.125 | >8  | >4           | 1 | 6  | 25 | 19 | t535  | E | E    | 225 | CC5   | II |
| B0033885 | 66 | M | 2016 | Zlin             | 0.125 | 2   | 8   | >16  | 0.5  | 0.06   | 0.06   | ≤0.03 | >8  | >4           | 2 | 6  | 30 | 21 | t1227 | 1 | 003  | -   | CC5   | -  |
| B0033911 | 85 | F | 2016 | Hradec Kralove   | 0.125 | 2   | 8   | >16  | 0.5  | 0.06   | ≤0.016 | 0.06  | >8  | <b>0.25</b>  | 1 | 6  | 27 | 20 | t151  | 1 | 003  | -   | CC5   | -  |
| B0033914 | 93 | F | 2016 | South Moravian   | 0.125 | 2   | 16  | >16  | 0.5  | 0.06   | ≤0.016 | 0.06  | >8  | >4           | 2 | 6  | 27 | 20 | t003  | 1 | 003  | -   | CC5   | -  |
| B0033934 | 62 | M | 2016 | Prague           | 0.125 | 2   | 8   | >16  | 0.5  | 0.06   | ≤0.016 | 0.125 | >8  | >4           | 2 | 6  | 29 | 19 | t9729 | 1 | 003  | -   | CC5   | -  |
| B0034008 | 70 | M | 2016 | Pilsen           | 0.25  | 2   | 8   | >8   | 0.5  | ≤0.125 | 0.008  | 0.125 | >8  | >4           | 1 | 6  | 28 | 20 | t014  | 1 | 003  | -   | CC5   | -  |
| B0034069 | 52 | M | 2016 | Prague           | 0.25  | 2   | 8   | >8   | >8   | 0.25   | >0.5   | 0.125 | >8  | >4           | 1 | 6  | 11 | 18 | t030  | 2 | 011  | -   | CC398 | -  |
| B0034112 | 87 | M | 2016 | Central Bohemian | 0.25  | 2   | 8   | >8   | 0.5  | ≤0.125 | 0.008  | 0.125 | >8  | >4           | 1 | 6  | 25 | 20 | t003  | 1 | 003  | -   | CC5   | -  |
| B0034130 | 36 | F | 2016 | South Moravian   | 0.25  | 2   | 8   | 0.5  | 0.5  | 1      | ≤0.004 | 0.125 | 0.5 | >4           | 1 | 15 | 7  | 21 | t034  | 2 | 011  | -   | CC398 | -  |
| B0034168 | 73 | F | 2016 | Hradec Kralove   | 0.25  | 2   | 8   | >8   | 0.5  | ≤0.125 | 0.008  | 0.125 | >8  | >4           | 1 | 6  | 28 | 19 | t014  | 1 | 003  | -   | CC5   | -  |
| B0034260 | 81 | F | 2016 | Prague           | 0.125 | 2   | 8   | >8   | >8   | 4      | ≤0.004 | 0.125 | >8  | >4           | 2 | 6  | 28 | 20 | t014  | 1 | 003  | -   | CC5   | -  |
| B0034261 | 81 | M | 2016 | Prague           | 0.125 | 2   | 32  | >8   | 0.25 | ≤0.125 | 0.008  | 0.125 | >8  | >4           | 1 | 6  | 29 | 20 | t014  | 1 | 003  | -   | CC5   | -  |
| B0034355 | 72 | F | 2016 | Prague           | 0.25  | 2   | 8   | 0.5  | 0.5  | ≤0.125 | 0.008  | 0.06  | >8  | >4           | 1 | 6  | 10 | 21 | t127  | S | S    | -   | CC1   | -  |
| B0034404 | 59 | M | 2016 | Hradec Kralove   | 0.125 | 2   | 8   | >8   | 1    | ≤0.125 | 0.008  | 0.125 | >8  | <b>0.25</b>  | 1 | 6  | 26 | 17 | t002  | 1 | 003  | -   | CC5   | -  |
| B0034411 | 66 | M | 2016 | Prague           | 0.25  | 2   | 8   | >8   | 1    | ≤0.125 | 0.008  | 0.125 | >8  | >4           | 2 | 6  | 27 | 22 | t014  | 1 | 003  | -   | CC5   | -  |
| B0034413 | 82 | M | 2016 | Central Bohemian | 0.25  | 2   | 8   | >8   | 0.5  | ≤0.125 | 0.008  | 0.25  | >8  | >4           | 1 | 6  | 26 | 19 | t003  | 1 | 003  | -   | CC5   | -  |
| B0034431 | 54 | F | 2016 | Hradec Kralove   | 0.25  | 2   | 8   | >8   | 0.25 | ≤0.125 | 0.008  | 0.125 | >8  | <b>0.25</b>  | 1 | 6  | 25 | 20 | t151  | 1 | 003  | -   | CC5   | -  |
| B0034439 | 72 | M | 2016 | Hradec Kralove   | 0.25  | 2   | 8   | >8   | 0.25 | ≤0.125 | 0.008  | 0.125 | >8  | >4           | 1 | 6  | 24 | 18 | t014  | 1 | 003  | -   | CC5   | -  |
| B0034475 | 68 | M | 2016 | Vysocina         | 0.125 | 2   | 8   | >8   | 0.25 | ≤0.125 | 0.008  | 0.125 | >8  | <b>0.25</b>  | 1 | 6  | 25 | 19 | t014  | 1 | 003  | -   | CC5   | -  |
| B0034480 | 85 | F | 2016 | Pilsen           | 0.125 | 2   | 8   | >8   | 0.5  | ≤0.125 | 0.008  | 0.125 | >8  | >4           | 1 | 9  | 25 | 20 | t003  | 1 | 003  | -   | CC5   | -  |
| B0034509 | 76 | M | 2016 | Prague           | 0.25  | 2   | 8   | >8   | 1    | ≤0.125 | 0.008  | 0.125 | >8  | <b>0.25</b>  | 2 | 6  | 28 | 21 | t002  | 1 | 003  | -   | CC5   | -  |
| B0034513 | 55 | F | 2016 | Prague           | 0.25  | 2   | 8   | >8   | >8   | 0.5    | 0.008  | 0.125 | >8  | >4           | 1 | 6  | 26 | 19 | t014  | 1 | 003  | -   | CC5   | -  |
| B0034562 | 66 | M | 2016 | Prague           | 0.125 | 2   | 8   | >8   | >8   | ≤0.125 | ≤0.004 | 0.125 | >8  | <b>0.125</b> | 1 | 16 | 26 | 21 | t014  | 1 | 003  | -   | CC5   | -  |
| B0034615 | 75 | M | 2016 | Zlin             | 0.125 | 2   | 8   | >8   | 0.5  | ≤0.125 | ≤0.004 | 0.125 | >8  | >4           | 1 | 17 | 27 | 22 | t003  | 1 | 003  | -   | CC5   | -  |
| B0034631 | 69 | F | 2016 | South Moravian   | 0.25  | 2   | 8   | >8   | 0.5  | ≤0.125 | 0.008  | 0.125 | >8  | >4           | 1 | 9  | 22 | 18 | t003  | 1 | 003  | -   | CC5   | -  |
| B0034659 | 67 | M | 2016 | South Bohemian   | 0.25  | 2   | 8   | >8   | 0.5  | ≤0.125 | 0.008  | 0.125 | >8  | >4           | 1 | 6  | 26 | 21 | t045  | 1 | 003  | -   | CC5   | -  |
| B0034699 | 60 | F | 2016 | Pilsen           | 0.25  | 2   | 8   | 0.25 | 1    | ≤0.125 | 0.008  | 0.125 | >8  | 0.25         | 1 | 16 | 27 | 21 | t008  | 4 | 024  | 8   | CC8   | nt |
| B0034707 | 67 | M | 2016 | South Bohemian   | 0.25  | 2   | 8   | >8   | 0.25 | ≤0.125 | 0.008  | 0.125 | >8  | >4           | 1 | 6  | 26 | 19 | t586  | E | E    | -   | CC5   | -  |
| B0034713 | 37 | M | 2016 | South Bohemian   | 0.25  | 2   | 16  | >8   | 0.25 | ≤0.125 | 0.008  | 0.125 | >8  | >4           | 1 | 6  | 26 | 20 | t586  | E | E    | -   | CC5   | -  |
| B0034760 | 94 | M | 2016 | Liberec          | 0.25  | 2   | 8   | >8   | 0.5  | ≤0.125 | 0.008  | 0.06  | >8  | >4           | 1 | 9  | 30 | 19 | t014  | 1 | 003  | -   | CC5   | -  |
| B0034821 | 71 | M | 2016 | Prague           | 0.125 | 2   | >64 | >8   | >8   | 0.25   | ≤0.004 | 0.125 | >8  | >4           | 1 | 6  | 32 | 19 | t586  | E | E    | 225 | CC5   | II |
| B0034866 | 81 | M | 2016 | Prague           | 0.25  | 2   | 8   | >8   | 0.5  | ≤0.125 | 0.008  | 0.125 | 0.5 | 0.25         | 1 | 6  | 30 | 18 | t032  | 3 | 2436 | 22  | CC22  | IV |
| B0034896 | 58 | F | 2016 | Pilsen           | 0.125 | 2   | 8   | >8   | 0.5  | ≤0.125 | 0.008  | 0.25  | >8  | >4           | 1 | 6  | 31 | 20 | t014  | 1 | 003  | -   | CC5   | -  |
| B0034897 | 64 | F | 2016 | Pilsen           | 0.25  | 2   | 8   | >8   | 1    | ≤0.125 | 0.008  | 0.125 | >8  | <b>0.25</b>  | 1 | 6  | 28 | 19 | t5516 | 3 | 2436 | -   | CC22  | -  |
| B0034898 | 81 | F | 2016 | Pilsen           | 0.25  | 0.5 | 8   | >8   | 0.5  | ≤0.125 | 0.008  | 0.125 | >8  | >4           | 1 | 6  | 31 | 19 | t014  | 1 | 003  | -   | CC5   | -  |
| B0034905 | 75 | M | 2016 | Prague           | 0.25  | 2   | 8   | >8   | 0.5  | ≤0.125 | 0.008  | 0.125 | >8  | >4           | 1 | 6  | 9  | 21 | t003  | 1 | 003  | -   | CC5   | -  |

|          |    |   |      |                  |       |   |     |    |      |        |        |       |    |    |   |    |    |    |        |   |     |   |     |   |
|----------|----|---|------|------------------|-------|---|-----|----|------|--------|--------|-------|----|----|---|----|----|----|--------|---|-----|---|-----|---|
| B0034917 | 87 | M | 2016 | Central Bohemian | 0.125 | 2 | 16  | >8 | 0.5  | ≤0.125 | 0.008  | 0.125 | >8 | >4 | 1 | 6  | 31 | 19 | t564   | 1 | 003 | - | CC5 | - |
| B0034918 | 55 | M | 2016 | Prague           | 0.25  | 2 | 8   | >8 | 0.5  | ≤0.125 | 0.008  | 0.25  | >8 | >4 | 1 | 6  | 30 | 18 | t1282  | 1 | 003 | - | CC5 | - |
| B0034947 | 78 | M | 2016 | Hradec Kralove   | 0.25  | 2 | 8   | >8 | 0.5  | ≤0.125 | 0.008  | 0.06  | >8 | >4 | 2 | 6  | 32 | 20 | t003   | 1 | 003 | - | CC5 | - |
| B0034961 | 81 | M | 2016 | Prague           | 0.125 | 2 | 8   | >8 | 0.5  | ≤0.125 | ≤0.004 | 0.06  | >8 | >4 | 2 | 6  | 32 | 21 | t014   | 1 | 003 | - | CC5 | - |
| B0034970 | 59 | M | 2016 | Prague           | 0.25  | 2 | 8   | >8 | 0.5  | ≤0.125 | 0.008  | 0.125 | >8 | >4 | 2 | 6  | 34 | 21 | t586   | E | E   | - | CC5 | - |
| B0035018 | 75 | F | 2016 | Zlin             | 0.125 | 2 | 8   | >8 | 0.5  | ≤0.125 | 0.008  | 0.125 | >8 | >4 | 1 | 6  | 24 | 21 | t003   | 1 | 003 | - | CC5 | - |
| B0035026 | 66 | M | 2016 | Liberec          | 0.25  | 2 | 16  | >8 | 0.5  | ≤0.125 | 0.008  | 0.125 | >8 | >4 | 1 | 6  | 30 | 21 | t014   | 1 | 003 | - | CC5 | - |
| B0035210 | 63 | M | 2016 | South Bohemian   | 0.125 | 1 | 8   | >8 | 0.25 | ≤0.125 | 0.016  | 0.125 | >8 | >4 | 1 | 9  | 26 | 21 | t003   | 1 | 003 | - | CC5 | - |
| B0035212 | 65 | M | 2016 | South Bohemian   | 0.125 | 2 | 8   | >8 | >8   | 0.25   | ≤0.004 | 0.125 | >8 | >4 | 1 | 6  | 28 | 18 | t586   | E | E   | - | CC5 | - |
| B0035213 | 93 | F | 2016 | South Bohemian   | 0.125 | 2 | 8   | >8 | 0.5  | ≤0.125 | 0.008  | 0.125 | >8 | >4 | 1 | 6  | 29 | 20 | t003   | 1 | 003 | - | CC5 | - |
| B0035227 | 5  | F | 2016 | Prague           | 0.25  | 2 | 8   | >8 | >8   | ≤0.125 | ≤0.004 | 0.06  | >8 | >4 | 1 | 6  | 30 | 19 | t024   | 4 | 024 | - | CC8 | - |
| B0035230 | 74 | M | 2016 | Prague           | 0.25  | 2 | 8   | >8 | 0.5  | ≤0.125 | 0.008  | 0.125 | >8 | >4 | 2 | 6  | 29 | 19 | t003   | 1 | 003 | - | CC5 | - |
| B0035236 | 65 | M | 2016 | Prague           | 0.125 | 2 | >64 | >8 | >8   | 0.25   | ≤0.004 | 0.125 | >8 | >4 | 1 | 6  | 28 | 19 | t586   | E | E   | - | CC5 | - |
| B0035242 | 82 | M | 2016 | Vysocina         | 0.25  | 2 | 8   | >8 | 0.5  | ≤0.125 | ≤0.004 | 0.125 | >8 | >4 | 1 | 6  | 27 | 21 | t003   | 1 | 003 | - | CC5 | - |
| B0035269 | 13 | M | 2016 | Hradec Kralove   | 0.25  | 2 | 8   | >8 | 0.5  | ≤0.125 | 0.008  | 0.125 | >8 | >4 | 1 | 6  | 27 | 20 | t003   | 1 | 003 | - | CC5 | - |
| B0035293 | 53 | M | 2016 | Hradec Kralove   | 0.25  | 2 | 8   | >8 | 0.5  | ≤0.125 | 0.008  | 0.125 | >8 | >4 | 1 | 6  | 28 | 20 | t003   | 1 | 003 | - | CC5 | - |
| B0035306 | 69 | F | 2016 | Prague           | 0.25  | 2 | 8   | >8 | 0.5  | ≤0.125 | ≤0.004 | 0.25  | >8 | >4 | 1 | 6  | 27 | 20 | t014   | 1 | 003 | - | CC5 | - |
| B0035392 | 60 | F | 2016 | South Bohemian   | 0.25  | 2 | 8   | >8 | 0.25 | ≤0.125 | 0.008  | 0.25  | >8 | >4 | 1 | 6  | 29 | 20 | t014   | 1 | 003 | - | CC5 | - |
| B0035454 | 87 | M | 2016 | Usti nad Labem   | 0.125 | 2 | 8   | >8 | 0.5  | ≤0.125 | 0.008  | 0.125 | >8 | >4 | 1 | 6  | 28 | 20 | t045   | 1 | 003 | - | CC5 | - |
| B0035487 | 62 | M | 2016 | Hradec Kralove   | 0.25  | 2 | 8   | >8 | 0.5  | 0.5    | ≤0.004 | 0.25  | >8 | >4 | 1 | 9  | 32 | 21 | t014   | 1 | 003 | - | CC5 | - |
| B0035499 | 84 | M | 2016 | Liberec          | 0.25  | 2 | 16  | >8 | 0.5  | ≤0.125 | 0.03   | 0.125 | >8 | >4 | 1 | 6  | 32 | 18 | t045   | 1 | 003 | - | CC5 | - |
| B0035511 | 63 | M | 2016 | Pilsen           | 0.25  | 2 | 8   | >8 | 0.5  | 2      | 0.008  | 0.25  | >8 | >4 | 1 | 6  | 29 | 21 | t003   | 1 | 003 | - | CC5 | - |
| B0035519 | 51 | M | 2016 | Vysocina         | 0.25  | 2 | 8   | >8 | 0.5  | ≤0.125 | 0.008  | 0.25  | >8 | >4 | 1 | 6  | 27 | 19 | t003   | 1 | 003 | - | CC5 | - |
| B0035633 | 20 | M | 2016 | Central Bohemian | 0.125 | 1 | 8   | >8 | >8   | 0.5    | ≤0.004 | 0.125 | >8 | >4 | 1 | 6  | 30 | 21 | t003   | 1 | 003 | - | CC5 | - |
| B0035657 | 72 | F | 2016 | Karlovy Vary     | 0.25  | 2 | 8   | >8 | 0.5  | ≤0.125 | 0.008  | 0.125 | >8 | >4 | 1 | 6  | 30 | 20 | t003   | 1 | 003 | - | CC5 | - |
| B0035661 | 87 | F | 2016 | Karlovy Vary     | 0.25  | 2 | 8   | >8 | 0.5  | ≤0.125 | 0.008  | 0.125 | >8 | >4 | 1 | 6  | 27 | 19 | t003   | 1 | 003 | - | CC5 | - |
| B0035685 | 79 | F | 2016 | Karlovy Vary     | 0.125 | 1 | 8   | >8 | >8   | 2      | ≤0.004 | 0.125 | >8 | >4 | 1 | 9  | 27 | 20 | t003   | 1 | 003 | - | CC5 | - |
| B0035729 | 70 | F | 2016 | Hradec Kralove   | 0.125 | 2 | 8   | >8 | 0.5  | 0.25   | ≤0.004 | 0.125 | >8 | >4 | 1 | 6  | 28 | 19 | t003   | 1 | 003 | - | CC5 | - |
| B0035738 | 82 | F | 2016 | Usti nad Labem   | 0.25  | 2 | 8   | >8 | 0.5  | ≤0.125 | 0.008  | 0.125 | >8 | >4 | 1 | 6  | 30 | 18 | t17154 | 1 | 003 | - | CC5 | - |
| B0035820 | 82 | F | 2016 | South Moravian   | 0.25  | 2 | 16  | >8 | 0.5  | ≤0.125 | 0.008  | 0.25  | >8 | >4 | 1 | 6  | 29 | 19 | t003   | 1 | 003 | - | CC5 | - |
| B0035860 | 65 | F | 2016 | Prague           | 0.25  | 2 | 8   | >8 | 0.25 | ≤0.125 | >0.5   | 0.125 | >8 | >4 | 2 | 6  | 31 | 21 | t014   | 1 | 003 | - | CC5 | - |
| B0035886 | 60 | M | 2016 | Vysocina         | 0.25  | 2 | 8   | >8 | 0.5  | ≤0.125 | 0.008  | 0.125 | >8 | >4 | 1 | 6  | 31 | 21 | t003   | 1 | 003 | - | CC5 | - |
| B0035904 | 36 | M | 2016 | Prague           | 0.125 | 2 | 8   | >8 | >8   | 1      | ≤0.004 | 0.125 | >8 | >4 | 1 | 6  | 34 | 19 | t014   | 1 | 003 | - | CC5 | - |
| B0035972 | 71 | F | 2016 | Vysocina         | 0.125 | 1 | 8   | >8 | 1    | ≤0.125 | 0.008  | 0.125 | >8 | >4 | 1 | 6  | 30 | 19 | t003   | 1 | 003 | - | CC5 | - |
| B0035974 | 80 | F | 2016 | Prague           | 0.25  | 2 | 8   | >8 | 1    | ≤0.125 | 0.008  | 0.125 | >8 | >4 | 1 | 6  | 32 | 20 | t003   | 1 | 003 | - | CC5 | - |
| B0035986 | 91 | F | 2016 | Prague           | 0.125 | 1 | 8   | >8 | 1    | ≤0.125 | 0.008  | 0.125 | >8 | >4 | 1 | 6  | 29 | 19 | t586   | E | E   | - | CC5 | - |
| B0035996 | 73 | F | 2016 | South Bohemian   | 0.125 | 1 | 8   | >8 | 0.5  | 4      | 0.008  | 0.125 | >8 | >4 | 2 | 6  | 30 | 25 | t463   | 1 | 003 | - | CC5 | - |
| B0036000 | 45 | M | 2016 | South Bohemian   | 0.25  | 2 | 8   | >8 | 0.5  | 4      | ≤0.004 | 0.125 | >8 | >4 | 1 | 14 | 27 | 25 | t463   | 1 | 003 | - | CC5 | - |

|          |    |   |      |                  |       |     |    |     |       |        |        |       |    |              |   |    |    |    |       |   |      |    |       |    |
|----------|----|---|------|------------------|-------|-----|----|-----|-------|--------|--------|-------|----|--------------|---|----|----|----|-------|---|------|----|-------|----|
| B0036009 | 70 | M | 2016 | South Bohemian   | 0.25  | 2   | 8  | >8  | 0.5   | 0.25   | 0.008  | 0.25  | >8 | >4           | 1 | 6  | 27 | 23 | t003  | 1 | 003  | -  | CC5   | -  |
| B0036058 | 85 | F | 2016 | South Moravian   | 0.25  | 2   | 16 | >8  | 0.5   | ≤0.125 | 0.008  | 0.125 | >8 | >4           | 1 | 6  | 31 | 22 | t003  | 1 | 003  | -  | CC5   | -  |
| B0036098 | 91 | F | 2016 | Pilsen           | 0.25  | 2   | 8  | >8  | 0.5   | ≤0.125 | 0.008  | 0.25  | >8 | >4           | 2 | 6  | 27 | 20 | t003  | 1 | 003  | -  | CC5   | -  |
| B0036101 | 69 | M | 2016 | Pilsen           | 0.25  | 2   | 8  | >8  | ≤0.06 | 0.25   | 0.008  | 0.25  | >8 | >4           | 1 | 6  | 28 | 21 | t014  | 1 | 003  | -  | CC5   | -  |
| B0036110 | 77 | M | 2016 | Pardubice        | 0.125 | 2   | 8  | >8  | 0.5   | ≤0.125 | ≤0.004 | 0.125 | >8 | <b>0.25</b>  | 1 | 6  | 29 | 19 | t002  | 1 | 003  | -  | CC5   | -  |
| B0036123 | 61 | M | 2016 | South Bohemian   | 0.125 | 2   | 8  | >8  | 0.5   | ≤0.125 | 0.008  | 0.125 | >8 | >4           | 1 | 6  | 29 | 20 | t003  | 1 | 003  | -  | CC5   | -  |
| B0036140 | 63 | M | 2016 | South Moravian   | 0.125 | 1   | 8  | >8  | 0.5   | ≤0.125 | ≤0.004 | 0.125 | >8 | >4           | 1 | 6  | 28 | 23 | t003  | 1 | 003  | -  | CC5   | -  |
| B0036169 | 69 | F | 2016 | Hradec Kralove   | 0.125 | 2   | 8  | >8  | 0.5   | ≤0.125 | 0.008  | 0.125 | >8 | >4           | 1 | 6  | 32 | 21 | t014  | 1 | 003  | -  | CC5   | -  |
| B0036259 | 58 | M | 2016 | Prague           | 0.125 | 2   | 8  | >8  | 0.5   | ≤0.125 | 0.008  | 0.25  | >8 | >4           | 1 | 6  | 27 | 20 | t586  | E | E    | -  | CC5   | -  |
| B0036296 | 75 | M | 2016 | South Bohemian   | 0.125 | 2   | 8  | >8  | >8    | ≤0.125 | ≤0.004 | 0.125 | >8 | <b>0.125</b> | 1 | 6  | 28 | 19 | t014  | 1 | 003  | -  | CC5   | -  |
| B0036298 | 67 | M | 2016 | South Bohemian   | 0.25  | 2   | 8  | >8  | 0.5   | ≤0.125 | 0.008  | 0.125 | >8 | >4           | 1 | 6  | 29 | 19 | t003  | 1 | 003  | -  | CC5   | -  |
| B0036317 | 48 | M | 2016 | Pilsen           | 0.25  | 2   | 8  | >8  | 0.5   | ≤0.125 | ≤0.004 | 0.25  | >8 | >4           | 1 | 6  | 11 | 23 | t014  | 1 | 003  | -  | CC5   | -  |
| B0036371 | 89 | M | 2016 | Olomouc          | 0.125 | 1   | 8  | >8  | 0.5   | ≤0.125 | ≤0.004 | 0.125 | >8 | >4           | 1 | 6  | 28 | 21 | t003  | 1 | 003  | -  | CC5   | -  |
| B0036381 | 68 | M | 2016 | South Bohemian   | 0.125 | 2   | 8  | >8  | 0.5   | ≤0.125 | 0.008  | 0.125 | >8 | >4           | 1 | 6  | 27 | 20 | t003  | 1 | 003  | -  | CC5   | -  |
| B0036396 | 36 | M | 2016 | Pilsen           | 0.125 | 2   | 8  | >8  | 0.5   | ≤0.125 | 0.008  | 0.125 | >8 | >4           | 1 | 6  | 28 | 19 | t014  | 1 | 003  | -  | CC5   | -  |
| B0036469 | 75 | F | 2016 | Pilsen           | 0.25  | 1   | 8  | >8  | 0.5   | ≤0.125 | 0.008  | 0.125 | >8 | >4           | 1 | 6  | 26 | 20 | t014  | 1 | 003  | -  | CC5   | -  |
| B0036499 | 77 | M | 2016 | Vysocina         | 0.125 | 1   | 8  | >8  | 0.5   | ≤0.125 | ≤0.004 | 0.125 | >8 | >4           | 1 | 6  | 27 | 21 | t003  | 1 | 003  | -  | CC5   | -  |
| B0036504 | 65 | F | 2016 | Vysocina         | 0.125 | 2   | 8  | >8  | >8    | ≤0.125 | ≤0.004 | 0.125 | >8 | >4           | 1 | 6  | 30 | 19 | t014  | 1 | 003  | -  | CC5   | -  |
| B0036519 | 72 | M | 2016 | Usti nad Labem   | 0.25  | 2   | 8  | >8  | 0.5   | ≤0.125 | 0.008  | 0.125 | >8 | >4           | 1 | 6  | 29 | 20 | t014  | 1 | 003  | -  | CC5   | -  |
| B0036536 | 68 | M | 2016 | Pardubice        | 0.125 | 1   | 8  | >8  | 0.5   | ≤0.125 | ≤0.004 | 0.06  | >8 | >4           | 1 | 6  | 33 | 19 | t003  | 1 | 003  | -  | CC5   | -  |
| B0036541 | 38 | F | 2016 | Prague           | 0.125 | 2   | 8  | >8  | 0.5   | ≤0.125 | ≤0.004 | 0.125 | >8 | >4           | 1 | 6  | 33 | 19 | t586  | E | E    | -  | CC5   | -  |
| B0036556 | 81 | F | 2016 | Zlin             | 0.125 | 2   | 32 | >8  | 0.5   | ≤0.125 | 0.008  | 0.125 | >8 | >4           | 1 | 6  | 27 | 19 | t003  | 1 | 003  | -  | CC5   | -  |
| B0036588 | 92 | M | 2016 | Prague           | 0.25  | 2   | 8  | >8  | 0.5   | ≤0.125 | 0.008  | 0.125 | >8 | >4           | 1 | 6  | 31 | 18 | t893  | 1 | 003  | -  | CC5   | -  |
| B0036600 | 53 | M | 2016 | Olomouc          | 0.125 | 2   | 8  | >8  | 1     | 0.25   | 0.008  | 0.25  | >8 | >4           | 1 | 6  | 29 | 18 | t003  | 1 | 003  | -  | CC5   | -  |
| B0036602 | 59 | M | 2016 | Pilsen           | 0.25  | 2   | 8  | >8  | 1     | ≤0.125 | 0.008  | 0.25  | >8 | <b>0.125</b> | 1 | 6  | 28 | 19 | t2436 | 3 | 2436 | 22 | CC22  | IV |
| B0036614 | 76 | M | 2016 | Central Bohemian | 0.125 | 2   | 8  | >8  | >8    | ≤0.125 | ≤0.004 | 0.125 | >8 | >4           | 1 | 6  | 25 | 19 | t014  | 1 | 003  | -  | CC5   | -  |
| B0036627 | 79 | F | 2016 | Vysocina         | 0.25  | 2   | 8  | >8  | 0.5   | ≤0.125 | 0.008  | 0.125 | >8 | <b>0.25</b>  | 1 | 6  | 28 | 19 | t014  | 1 | 003  | -  | CC5   | -  |
| B0036640 | 60 | M | 2016 | Vysocina         | 0.25  | 2   | 8  | >8  | 0.5   | ≤0.125 | ≤0.004 | 0.125 | >8 | >4           | 1 | 6  | 30 | 18 | t003  | 1 | 003  | -  | CC5   | -  |
| B0036718 | 55 | M | 2016 | Central Bohemian | 0.125 | 0.5 | 8  | >8  | 0.5   | ≤0.125 | 0.008  | 0.125 | >8 | >4           | 1 | 6  | 31 | 21 | t586  | E | E    | -  | CC5   | -  |
| B0036765 | 33 | M | 2016 | South Bohemian   | 0.125 | 2   | 8  | >8  | 0.5   | ≤0.125 | 0.008  | 0.125 | >8 | >4           | 1 | 6  | 29 | 20 | t586  | E | E    | -  | CC5   | -  |
| B0036790 | 70 | M | 2016 | Hradec Kralove   | 0.5   | 2   | 8  | 0.5 | 0.5   | 1      | 0.008  | 0.06  | >8 | >4           | 1 | 17 | 6  | 20 | t034  | 2 | 011  | -  | CC398 | -  |
| B0036797 | 95 | F | 2016 | South Moravian   | 0.125 | 1   | 8  | >8  | 0.5   | ≤0.125 | ≤0.004 | 0.125 | >8 | >4           | 1 | 6  | 30 | 20 | t003  | 1 | 003  | -  | CC5   | -  |
| B0036842 | 53 | M | 2016 | Pilsen           | 0.25  | 2   | 8  | 0.5 | 0.5   | ≤0.125 | ≤0.004 | 0.125 | >8 | <b>0.125</b> | 1 | 14 | 11 | 25 | t127  | S | S    | -  | CC1   | -  |
| B0036853 | 66 | M | 2016 | Prague           | 0.125 | 1   | 8  | >8  | 1     | ≤0.125 | ≤0.004 | 0.25  | >8 | >4           | 1 | 6  | 29 | 20 | t586  | E | E    | -  | CC5   | -  |
| B0036855 | 80 | F | 2016 | Prague           | 0.125 | 1   | 8  | >8  | 1     | ≤0.125 | ≤0.004 | 0.125 | >8 | >4           | 1 | 6  | 32 | 20 | t003  | 1 | 003  | -  | CC5   | -  |
| B0036856 | 58 | M | 2016 | Prague           | 0.125 | 1   | 8  | >8  | 0.5   | ≤0.125 | 0.008  | 0.25  | >8 | >4           | 1 | 6  | 28 | 18 | t586  | E | E    | -  | CC5   | -  |
| B0036860 | 81 | F | 2016 | Central Bohemian | 0.125 | 2   | 16 | >8  | >8    | ≤0.125 | 0.008  | 0.125 | >8 | >4           | 1 | 6  | 30 | 20 | t014  | 1 | 003  | -  | CC5   | -  |
| B0036907 | 63 | M | 2016 | Pilsen           | 0.25  | 2   | 8  | >8  | 0.5   | ≤0.125 | 0.008  | 0.125 | >8 | >4           | 1 | 6  | 11 | 21 | t586  | E | E    | -  | CC5   | -  |

|          |    |   |      |                  |       |   |   |     |       |        |        |       |     |              |   |    |    |    |      |   |     |     |       |    |
|----------|----|---|------|------------------|-------|---|---|-----|-------|--------|--------|-------|-----|--------------|---|----|----|----|------|---|-----|-----|-------|----|
| B0036948 | 80 | M | 2016 | Karlovy Vary     | 0.125 | 1 | 8 | >8  | 0.5   | ≤0.125 | 0.008  | 0.06  | >8  | >4           | 1 | 15 | 26 | 25 | t034 | 2 | 011 | -   | CC398 | -  |
| B0036952 | 77 | M | 2016 | Karlovy Vary     | 0.06  | 1 | 4 | >8  | 0.5   | ≤0.125 | ≤0.004 | 0.06  | >8  | >4           | 1 | 15 | 29 | 23 | t003 | 1 | 003 | -   | CC5   | -  |
| B0036958 | 78 | F | 2016 | Karlovy Vary     | 0.5   | 2 | 8 | >8  | ≤0.06 | ≤0.125 | ≤0.004 | 0.125 | >8  | >4           | 1 | 6  | 29 | 22 | t003 | 1 | 003 | -   | CC5   | -  |
| B0036976 | 53 | F | 2016 | Olomouc          | 0.25  | 2 | 8 | >8  | 0.5   | ≤0.125 | ≤0.004 | 0.125 | >8  | >4           | 1 | 6  | 30 | 22 | t003 | 1 | 003 | -   | CC5   | -  |
| B0037034 | 82 | M | 2016 | Pilsen           | 0.125 | 2 | 8 | >8  | 0.5   | ≤0.125 | 0.008  | 0.25  | >8  | >4           | 1 | 6  | 26 | 21 | t586 | E | E   | -   | CC5   | -  |
| B0037052 | 88 | M | 2016 | South Bohemian   | 0.125 | 2 | 8 | >8  | 0.5   | ≤0.125 | 0.008  | 0.125 | >8  | >4           | 1 | 6  | 32 | 22 | t003 | 1 | 003 | -   | CC5   | -  |
| B0037053 | 75 | M | 2016 | South Bohemian   | 0.25  | 2 | 8 | >8  | 0.25  | ≤0.125 | ≤0.004 | 0.06  | >8  | >4           | 1 | 6  | 28 | 18 | t003 | 1 | 003 | -   | CC5   | -  |
| B0037072 | 72 | M | 2016 | Prague           | 0.125 | 1 | 8 | >8  | 0.5   | ≤0.125 | ≤0.004 | 0.06  | >8  | >4           | 1 | 6  | 26 | 20 | t586 | E | E   | -   | CC5   | -  |
| B0037087 | 69 | F | 2016 | Prague           | 0.25  | 2 | 8 | 0.5 | 1     | 0.5    | ≤0.004 | 0.125 | 0.5 | >4           | 1 | 17 | 6  | 22 | t034 | 2 | 011 | 398 | CC398 | V  |
| B0037156 | 71 | M | 2016 | Pilsen           | 0.125 | 2 | 8 | >8  | 0.5   | ≤0.125 | 0.008  | 0.25  | >8  | >4           | 2 | 6  | 31 | 21 | t003 | 1 | 003 | -   | CC5   | -  |
| B0037165 | 89 | F | 2016 | South Bohemian   | 0.25  | 2 | 8 | >8  | 0.25  | ≤0.125 | ≤0.004 | 0.125 | >8  | >4           | 1 | 6  | 30 | 20 | t003 | 1 | 003 | -   | CC5   | -  |
| B0037186 | 72 | M | 2016 | Prague           | 0.125 | 2 | 4 | >8  | 0.5   | 0.25   | 0.008  | 0.125 | >8  | <b>0.125</b> | 1 | 6  | 29 | 20 | t003 | 1 | 003 | -   | CC5   | -  |
| B0037223 | 79 | F | 2016 | Hradec Kralove   | 0.125 | 1 | 8 | >8  | 0.5   | ≤0.125 | 0.008  | 0.125 | >8  | >4           | 1 | 6  | 28 | 20 | t003 | 1 | 003 | -   | CC5   | -  |
| B0037224 | 73 | F | 2016 | Hradec Kralove   | 0.125 | 2 | 8 | >8  | 0.5   | ≤0.125 | 0.008  | 0.125 | >8  | <b>0.25</b>  | 1 | 6  | 28 | 20 | t014 | 1 | 003 | -   | CC5   | -  |
| B0037227 | 64 | M | 2016 | Prague           | 0.125 | 1 | 4 | 0.5 | >8    | ≤0.125 | ≤0.004 | 4     | 0.5 | 0.125        | 1 | 16 | 27 | 24 | t359 | 6 | NF  | 97  | CC97  | V  |
| B0037257 | 66 | M | 2016 | Prague           | 0.125 | 2 | 8 | >8  | 0.5   | ≤0.125 | 0.008  | 0.125 | >8  | <b>0.25</b>  | 1 | 6  | 25 | 19 | t002 | 1 | 003 | -   | CC5   | -  |
| B0037293 | 50 | M | 2016 | Prague           | 0.125 | 2 | 8 | >8  | 0.5   | 0.25   | 0.008  | 0.125 | >8  | >4           | 1 | 6  | 28 | 22 | t003 | 1 | 003 | -   | CC5   | -  |
| B0037323 | 79 | M | 2016 | Prague           | 0.125 | 2 | 8 | >8  | 0.5   | 0.25   | ≤0.004 | 0.5   | >8  | >4           | 1 | 15 | 26 | 23 | t003 | 1 | 003 | -   | CC5   | -  |
| B0037343 | 80 | M | 2016 | Prague           | 0.125 | 1 | 8 | >8  | 0.5   | ≤0.125 | ≤0.004 | 0.125 | >8  | >4           | 1 | 6  | 27 | 20 | t586 | E | E   | -   | CC5   | -  |
| B0037402 | 74 | M | 2016 | Olomouc          | 0.125 | 2 | 8 | >8  | 0.5   | ≤0.125 | 0.008  | 0.125 | >8  | >4           | 1 | 6  | 27 | 20 | t003 | 1 | 003 | -   | CC5   | -  |
| B0037413 | 78 | F | 2017 | Pilsen           | 0.125 | 2 | 8 | >8  | ≤0.06 | ≤0.125 | ≤0.004 | 0.25  | >8  | >4           | 1 | 6  | 30 | 20 | t014 | 1 | 003 | -   | CC5   | -  |
| B0037414 | 51 | M | 2016 | South Moravian   | 0.125 | 1 | 4 | >8  | 0.125 | ≤0.125 | >0.5   | 0.06  | >8  | >4           | 2 | 6  | 30 | 23 | t003 | 1 | 003 | -   | CC5   | -  |
| B0037428 | 81 | M | 2016 | Usti nad Labem   | 0.125 | 1 | 8 | >8  | 0.5   | ≤0.125 | ≤0.004 | 0.125 | >8  | >4           | 1 | 6  | 27 | 20 | t014 | 1 | 003 | -   | CC5   | -  |
| B0037438 | 65 | M | 2016 | Pilsen           | 0.125 | 1 | 4 | >8  | 0.5   | ≤0.125 | ≤0.004 | 0.125 | >8  | <b>0.125</b> | 1 | 6  | 27 | 20 | t014 | 1 | 003 | -   | CC5   | -  |
| B0037446 | 87 | F | 2016 | Pilsen           | 0.125 | 2 | 8 | >8  | 0.5   | ≤0.125 | 0.008  | 0.125 | >8  | >4           | 1 | 6  | 25 | 22 | t014 | 1 | 003 | -   | CC5   | -  |
| B0037456 | 83 | M | 2016 | Pilsen           | 0.125 | 1 | 8 | >8  | 0.5   | ≤0.125 | 0.008  | 0.125 | >8  | >4           | 1 | 6  | 28 | 19 | t014 | 1 | 003 | -   | CC5   | -  |
| B0037458 | 94 | F | 2016 | Pilsen           | 0.125 | 1 | 4 | 0.5 | 0.5   | ≤0.125 | 0.008  | 0.125 | 0.5 | 0.125        | 1 | 6  | 12 | 20 | t437 | S | S   | -   | CC59  | -  |
| B0037459 | 38 | F | 2016 | Pilsen           | 0.125 | 1 | 8 | >8  | 0.5   | ≤0.125 | ≤0.004 | 0.06  | >8  | >4           | 1 | 6  | 30 | 24 | t003 | 1 | 003 | -   | CC5   | -  |
| B0037504 | 84 | F | 2016 | Vysocina         | 0.125 | 1 | 4 | >8  | >8    | 8      | ≤0.004 | 0.06  | >8  | <b>0.125</b> | 1 | 6  | 30 | 20 | t002 | 1 | 003 | -   | CC5   | -  |
| B0037529 | 69 | M | 2017 | Vysocina         | 0.125 | 1 | 8 | >8  | 0.5   | ≤0.125 | ≤0.004 | 0.125 | >8  | >4           | 1 | 6  | 27 | 21 | t003 | 1 | 003 | -   | CC5   | -  |
| B0037532 | 61 | F | 2017 | Prague           | 0.125 | 1 | 8 | >8  | 0.25  | ≤0.125 | 0.008  | 0.125 | >8  | >4           | 1 | 6  | 29 | 21 | t003 | 1 | 003 | -   | CC5   | -  |
| B0037533 | 85 | M | 2017 | Central Bohemian | 0.125 | 2 | 8 | >8  | >8    | ≤0.125 | 0.008  | 0.125 | 1   | 0.125        | 1 | 6  | 25 | 20 | t014 | 1 | 003 | 225 | CC5   | II |
| B0037561 | 86 | F | 2016 | Pilsen           | 0.125 | 2 | 8 | >8  | 1     | ≤0.125 | 0.008  | 0.125 | >8  | >4           | 1 | 6  | 27 | 21 | t003 | 1 | 003 | -   | CC5   | -  |
| B0037579 | 67 | M | 2017 | Prague           | 0.25  | 2 | 8 | >8  | 0.5   | 0.5    | 0.008  | 0.125 | >8  | <b>0.25</b>  | 2 | 6  | 26 | 19 | t062 | 1 | 003 | -   | CC5   | -  |
| B0037602 | 79 | F | 2017 | South Bohemian   | 0.125 | 2 | 8 | >8  | 0.5   | ≤0.125 | 0.008  | 0.125 | >8  | >4           | 1 | 6  | 28 | 21 | t003 | 1 | 003 | -   | CC5   | -  |
| B0037623 | 62 | M | 2017 | Prague           | 0.125 | 2 | 8 | >8  | 0.5   | ≤0.125 | ≤0.004 | 0.125 | 1   | 0.125        | 1 | 6  | 26 | 23 | t003 | 1 | 003 | -   | CC5   | -  |
| B0037625 | 64 | F | 2017 | South Moravian   | 0.125 | 1 | 8 | >8  | 0.5   | ≤0.125 | ≤0.004 | 0.125 | >8  | >4           | 1 | 6  | 27 | 23 | t003 | 1 | 003 | -   | CC5   | -  |
| B0037681 | 74 | F | 2017 | Prague           | 0.125 | 1 | 8 | >8  | 0.5   | ≤0.125 | ≤0.004 | 0.125 | >8  | >4           | 1 | 6  | 28 | 20 | t586 | E | E   | -   | CC5   | -  |

|          |    |   |      |                |       |   |     |     |      |        |        |       |     |              |   |    |    |    |      |   |     |     |       |    |
|----------|----|---|------|----------------|-------|---|-----|-----|------|--------|--------|-------|-----|--------------|---|----|----|----|------|---|-----|-----|-------|----|
| B0037687 | 87 | F | 2016 | South Bohemian | 0.125 | 1 | 8   | >8  | >8   | 2      | ≤0.004 | 0.125 | >8  | >4           | 1 | 6  | 28 | 21 | t586 | E | E   | -   | CC5   | -  |
| B0037689 | 83 | M | 2016 | South Bohemian | 0.25  | 1 | 8   | >8  | 0.5  | ≤0.125 | 0.008  | 0.125 | >8  | >4           | 1 | 6  | 27 | 19 | t586 | E | E   | -   | CC5   | -  |
| B0037703 | 60 | M | 2017 | Vysocina       | 0.125 | 1 | 8   | >8  | 0.5  | ≤0.125 | 0.008  | 0.125 | >8  | >4           | 1 | 6  | 28 | 22 | t003 | 1 | 003 | -   | CC5   | -  |
| B0037709 | 83 | F | 2017 | Prague         | 0.125 | 1 | 4   | >8  | 0.5  | ≤0.125 | 0.008  | 0.125 | >8  | >4           | 1 | 6  | 26 | 20 | t014 | 1 | 003 | -   | CC5   | -  |
| B0037711 | 58 | F | 2017 | Liberec        | 0.125 | 1 | 8   | >8  | 0.5  | ≤0.125 | 0.008  | 0.125 | >8  | >4           | 1 | 6  | 28 | 20 | t586 | E | E   | -   | CC5   | -  |
| B0037714 | 78 | F | 2017 | Pardubice      | 0.125 | 2 | 8   | >8  | 0.5  | ≤0.125 | 0.008  | 0.125 | >8  | >4           | 1 | 6  | 28 | 20 | t014 | 1 | 003 | -   | CC5   | -  |
| B0037746 | 79 | F | 2016 | South Moravian | 0.25  | 2 | 8   | >8  | 0.5  | ≤0.125 | ≤0.004 | 0.125 | >8  | >4           | 1 | 6  | 26 | 24 | t003 | 1 | 003 | -   | CC5   | -  |
| B0037761 | 69 | M | 2017 | Prague         | 0.125 | 2 | 8   | >8  | 1    | ≤0.125 | ≤0.004 | 0.125 | >8  | >4           | 1 | 6  | 29 | 21 | t586 | E | E   | -   | CC5   | -  |
| B0037765 | 75 | M | 2017 | Prague         | 0.125 | 2 | 8   | >8  | >8   | ≤0.125 | ≤0.004 | 0.125 | >8  | >4           | 1 | 6  | 29 | 21 | t014 | 1 | 003 | -   | CC5   | -  |
| B0037793 | 69 | M | 2017 | Prague         | 0.125 | 2 | 8   | >8  | 0.5  | ≤0.125 | ≤0.004 | 0.125 | >8  | >4           | 1 | 6  | 32 | 18 | t586 | E | E   | -   | CC5   | -  |
| B0037804 | 63 | F | 2017 | Prague         | 0.25  | 2 | 8   | >8  | 0.5  | ≤0.125 | 0.25   | 0.25  | >8  | >4           | 2 | 6  | 32 | 22 | t014 | 1 | 003 | -   | CC5   | -  |
| B0037807 | 53 | M | 2017 | South Bohemian | 0.25  | 2 | 8   | >8  | 0.5  | ≤0.125 | ≤0.004 | 0.125 | >8  | >4           | 1 | 6  | 26 | 19 | t003 | 1 | 003 | -   | CC5   | -  |
| B0037889 | 64 | M | 2017 | Prague         | 0.25  | 2 | 8   | >8  | 0.5  | ≤0.125 | ≤0.004 | 0.125 | >8  | >4           | 1 | 6  | 29 | 19 | t003 | 1 | 003 | -   | CC5   | -  |
| B0037950 | 61 | M | 2017 | Pardubice      | 0.125 | 2 | 8   | >8  | 0.5  | ≤0.125 | ≤0.004 | 0.125 | >8  | >4           | 1 | 6  | 29 | 20 | t586 | E | E   | -   | CC5   | -  |
| B0037993 | 79 | M | 2017 | Hradec Kralove | 0.125 | 1 | >64 | >8  | >8   | ≤0.125 | ≤0.004 | 0.125 | >8  | <b>0.25</b>  | 2 | 6  | 31 | 19 | t002 | 1 | 003 | 5   | CC5   | II |
| B0038013 | 68 | M | 2017 | Zlin           | 0.125 | 1 | >64 | >8  | 0.5  | ≤0.125 | ≤0.004 | 0.125 | >8  | >4           | 1 | 6  | 30 | 21 | t003 | 1 | 003 | -   | CC5   | -  |
| B0038056 | 71 | F | 2017 | Pilsen         | 0.125 | 1 | 8   | >8  | 1    | ≤0.125 | ≤0.004 | 0.06  | >8  | >4           | 1 | 6  | 32 | 20 | t014 | 1 | 003 | -   | CC5   | -  |
| B0038062 | 87 | F | 2017 | Prague         | 0.125 | 1 | 4   | 0.5 | 0.25 | ≤0.125 | ≤0.004 | 0.06  | >8  | <b>0.125</b> | 1 | 6  | 10 | 23 | t127 | S | S   | -   | CC1   | -  |
| B0038095 | 71 | F | 2017 | Prague         | 0.125 | 2 | 8   | >8  | 0.5  | ≤0.125 | ≤0.004 | 0.125 | >8  | >4           | 1 | 6  | 29 | 20 | t586 | E | E   | -   | CC5   | -  |
| B0038106 | 75 | F | 2017 | Pardubice      | 0.125 | 2 | 8   | >8  | 1    | ≤0.125 | ≤0.004 | 0.125 | >8  | >4           | 1 | 6  | 31 | 20 | t014 | 1 | 003 | -   | CC5   | -  |
| B0038133 | 47 | M | 2017 | Pilsen         | 0.25  | 2 | 16  | >8  | 0.5  | 0.25   | 0.008  | 0.25  | >8  | >4           | 1 | 6  | 29 | 24 | t014 | 1 | 003 | -   | CC5   | -  |
| B0038173 | 61 | M | 2017 | Prague         | 0.125 | 2 | 8   | >8  | 0.5  | 0.25   | ≤0.004 | 0.125 | >8  | >4           | 1 | 6  | 28 | 21 | t003 | 1 | 003 | -   | CC5   | -  |
| B0038204 | 50 | M | 2017 | Prague         | 0.125 | 1 | 8   | >8  | >8   | ≤0.125 | ≤0.004 | 0.125 | >8  | >4           | 1 | 6  | 34 | 21 | t014 | 1 | 003 | -   | CC5   | -  |
| B0038207 | 66 | F | 2017 | Prague         | 0.125 | 2 | 8   | >8  | 0.5  | ≤0.125 | ≤0.004 | 0.125 | >8  | >4           | 1 | 6  | 30 | 21 | t003 | 1 | 003 | -   | CC5   | -  |
| B0038212 | 52 | M | 2017 | Pilsen         | 0.125 | 2 | 8   | >8  | 1    | ≤0.125 | ≤0.004 | 0.125 | >8  | >4           | 1 | 6  | 31 | 21 | t014 | 1 | 003 | -   | CC5   | -  |
| B0038218 | 66 | M | 2017 | South Bohemian | 0.125 | 2 | 8   | >8  | >8   | 0.25   | ≤0.004 | 0.125 | >8  | >4           | 1 | 6  | 30 | 19 | t586 | E | E   | -   | CC5   | -  |
| B0038219 | 77 | F | 2017 | South Bohemian | 0.125 | 1 | 8   | >8  | >8   | 0.25   | ≤0.004 | 0.125 | >8  | >4           | 1 | 6  | 11 | 19 | t586 | E | E   | -   | CC5   | -  |
| B0038224 | 75 | M | 2017 | South Bohemian | 0.125 | 1 | 8   | >8  | >8   | ≤0.125 | ≤0.004 | 0.125 | >8  | >4           | 2 | 6  | 29 | 19 | t586 | E | E   | -   | CC5   | -  |
| B0038225 | 69 | M | 2017 | South Bohemian | 0.125 | 1 | 8   | >8  | >8   | 0.25   | ≤0.004 | 0.125 | >8  | >4           | 1 | 6  | 30 | 19 | t586 | E | E   | -   | CC5   | -  |
| B0038236 | 79 | M | 2017 | Prague         | 0.125 | 1 | >64 | >8  | >8   | 0.25   | ≤0.004 | 0.125 | >8  | >4           | 1 | 6  | 31 | 20 | t586 | E | E   | -   | CC5   | -  |
| B0038254 | 81 | F | 2017 | Prague         | 0.125 | 2 | 16  | >8  | 1    | ≤0.125 | ≤0.004 | 0.125 | >8  | >4           | 1 | 6  | 33 | 21 | t003 | 1 | 003 | -   | CC5   | -  |
| B0038324 | 72 | F | 2017 | Pilsen         | 0.25  | 2 | 8   | >8  | 1    | ≤0.125 | 0.008  | 0.125 | >8  | <b>0.25</b>  | 1 | 6  | 30 | 20 | t014 | 1 | 003 | -   | CC5   | -  |
| B0038325 | 53 | M | 2017 | Pilsen         | 0.125 | 1 | 4   | >8  | 0.5  | ≤0.125 | ≤0.004 | 0.125 | >8  | <b>0.125</b> | 1 | 6  | 39 | 20 | t014 | 1 | 003 | -   | CC5   | -  |
| B0038358 | 78 | M | 2017 | Hradec Kralove | 0.125 | 1 | 8   | >8  | 0.5  | ≤0.125 | ≤0.004 | 0.125 | >8  | >4           | 1 | 13 | 31 | 24 | t003 | 1 | 003 | -   | CC5   | -  |
| B0038388 | 50 | M | 2016 | Karlovy Vary   | 0.125 | 1 | 4   | >8  | 0.5  | ≤0.125 | ≤0.004 | 0.06  | >8  | >4           | 1 | 6  | 34 | 22 | t003 | 1 | 003 | -   | CC5   | -  |
| B0038407 | 77 | M | 2017 | Karlovy Vary   | 0.125 | 1 | 8   | >8  | 0.5  | ≤0.125 | ≤0.004 | 0.125 | >8  | >4           | 1 | 6  | 31 | 19 | t586 | E | E   | -   | CC5   | -  |
| B0038411 | 82 | M | 2017 | Karlovy Vary   | 0.125 | 1 | 8   | >8  | 0.25 | ≤0.125 | ≤0.004 | 0.125 | >8  | >4           | 1 | 6  | 33 | 19 | t003 | 1 | 003 | -   | CC5   | -  |
| B0038416 | 63 | M | 2017 | Karlovy Vary   | 0.25  | 1 | 4   | 2   | 0.5  | ≤0.125 | ≤0.004 | 0.06  | 0.5 | 0.125        | 1 | 15 | 6  | 24 | t011 | 2 | 011 | 398 | CC398 | V  |

|          |    |   |      |                  |       |   |     |      |      |        |        |       |     |              |   |    |    |    |       |   |     |     |       |    |
|----------|----|---|------|------------------|-------|---|-----|------|------|--------|--------|-------|-----|--------------|---|----|----|----|-------|---|-----|-----|-------|----|
| B0038426 | 89 | M | 2017 | Pardubice        | 0.125 | 2 | 8   | >8   | 0.5  | ≤0.125 | ≤0.004 | 0.125 | >8  | >4           | 1 | 6  | 28 | 22 | t014  | 1 | 003 | -   | CC5   | -  |
| B0038503 | 82 | F | 2017 | South Moravian   | 0.125 | 2 | 8   | >8   | 1    | ≤0.125 | 0.008  | 0.06  | >8  | <b>0.125</b> | 1 | 6  | 31 | 23 | t002  | 1 | 003 | -   | CC5   | -  |
| B0038509 | 57 | M | 2017 | Central Bohemian | 0.125 | 1 | 4   | 0.25 | 0.5  | 2      | ≤0.004 | 0.06  | 0.5 | >4           | 1 | 17 | 6  | 23 | t898  | 2 | 011 | -   | CC398 | -  |
| B0038512 | 71 | F | 2017 | Liberec          | 0.125 | 2 | 8   | >8   | 0.5  | ≤0.125 | 0.008  | 2     | >8  | >4           | 1 | 6  | 31 | 21 | t586  | E | E   | -   | CC5   | -  |
| B0038541 | 54 | M | 2017 | Prague           | 0.25  | 2 | 8   | >8   | 1    | ≤0.125 | ≤0.004 | 0.125 | >8  | >4           | 2 | 6  | 30 | 21 | t264  | 1 | 003 | -   | CC5   | -  |
| B0038546 | 85 | F | 2017 | South Bohemian   | 0.125 | 2 | 8   | >8   | 0.5  | ≤0.125 | ≤0.004 | 0.125 | >8  | <b>0.125</b> | 1 | 6  | 33 | 19 | t003  | 1 | 003 | -   | CC5   | -  |
| B0038549 | 82 | M | 2017 | South Bohemian   | 0.125 | 1 | 8   | >8   | 0.5  | ≤0.125 | ≤0.004 | 0.125 | >8  | >4           | 1 | 6  | 36 | 19 | t586  | E | E   | -   | CC5   | -  |
| B0038550 | 53 | M | 2017 | South Bohemian   | 0.125 | 1 | 8   | >8   | 0.25 | ≤0.125 | 0.008  | 0.125 | >8  | >4           | 1 | 6  | 34 | 21 | t003  | 1 | 003 | -   | CC5   | -  |
| B0038582 | 57 | F | 2017 | Prague           | 0.25  | 2 | 8   | >8   | 0.5  | ≤0.125 | 0.008  | 0.25  | >8  | >4           | 1 | 6  | 28 | 21 | t003  | 1 | 003 | -   | CC5   | -  |
| B0038591 | 85 | M | 2017 | Prague           | 0.25  | 2 | 8   | >8   | 0.5  | 0.5    | ≤0.004 | 0.125 | >8  | >4           | 1 | 6  | 31 | 22 | t003  | 1 | 003 | -   | CC5   | -  |
| B0038691 | 63 | M | 2017 | Hradec Kralove   | 0.25  | 2 | 8   | >8   | 0.5  | 0.25   | ≤0.004 | 0.125 | >8  | >4           | 1 | 11 | 33 | 21 | t014  | 1 | 003 | -   | CC5   | -  |
| B0038755 | 76 | F | 2017 | Pilsen           | 0.25  | 2 | 8   | >8   | 0.5  | ≤0.125 | 0.008  | 4     | >8  | >4           | 1 | 6  | 32 | 21 | t003  | 1 | 003 | -   | CC5   | -  |
| B0038760 | 64 | M | 2017 | Liberec          | 0.25  | 1 | 8   | >8   | 0.5  | 0.25   | ≤0.004 | 0.125 | >8  | >4           | 1 | 9  | 29 | 22 | t045  | 1 | 003 | -   | CC5   | -  |
| B0038815 | 91 | F | 2017 | Pardubice        | 0.125 | 2 | 8   | >8   | 0.5  | ≤0.125 | ≤0.004 | 0.25  | >8  | >4           | 1 | 6  | 29 | 19 | t014  | 1 | 003 | -   | CC5   | -  |
| B0038821 | 73 | M | 2017 | Prague           | 0.25  | 2 | 8   | >8   | 1    | ≤0.125 | ≤0.004 | 0.25  | >8  | >4           | 1 | 6  | 33 | 24 | t014  | 1 | 003 | -   | CC5   | -  |
| B0038842 | 73 | F | 2017 | Usti nad Labem   | 0.25  | 2 | 8   | >8   | 0.5  | ≤0.125 | ≤0.004 | 0.125 | >8  | >4           | 1 | 6  | 26 | 20 | t014  | 1 | 003 | -   | CC5   | -  |
| B0038846 | 71 | F | 2017 | Usti nad Labem   | 0.125 | 2 | 8   | >8   | 0.5  | ≤0.125 | ≤0.004 | 0.125 | >8  | >4           | 1 | 6  | 28 | 21 | t003  | 1 | 003 | -   | CC5   | -  |
| B0038849 | 71 | F | 2017 | Usti nad Labem   | 0.125 | 2 | 8   | >8   | 1    | ≤0.125 | ≤0.004 | 4     | >8  | >4           | 1 | 6  | 31 | 21 | t003  | 1 | 003 | -   | CC5   | -  |
| B0038865 | 84 | M | 2017 | Pilsen           | 0.125 | 2 | >64 | >8   | >8   | ≤0.125 | ≤0.004 | 0.125 | >8  | <b>0.125</b> | 1 | 6  | 29 | 20 | t003  | 1 | 003 | -   | CC5   | -  |
| B0038958 | 64 | M | 2017 | South Moravian   | 0.25  | 2 | 8   | >8   | 0.5  | ≤0.125 | ≤0.004 | 0.125 | >8  | >4           | 1 | 6  | 29 | 22 | t003  | 1 | 003 | -   | CC5   | -  |
| B0038965 | 60 | F | 2017 | Prague           | 0.25  | 2 | 8   | >8   | 0.5  | ≤0.125 | 0.008  | 0.25  | >8  | <b>0.125</b> | 1 | 6  | 27 | 21 | t003  | 1 | 003 | -   | CC5   | -  |
| B0038966 | 63 | M | 2017 | Prague           | 0.25  | 2 | 8   | >8   | 1    | ≤0.125 | ≤0.004 | 0.25  | >8  | >4           | 1 | 6  | 31 | 21 | t586  | E | E   | 225 | CC5   | II |
| B0038978 | 68 | F | 2017 | Pilsen           | 0.25  | 2 | 8   | >8   | 0.5  | ≤0.125 | ≤0.004 | 0.125 | >8  | >4           | 1 | 6  | 29 | 19 | t003  | 1 | 003 | -   | CC5   | -  |
| B0039011 | 83 | M | 2017 | Hradec Kralove   | 0.125 | 2 | >64 | >8   | >8   | ≤0.125 | ≤0.004 | 0.125 | >8  | >4           | 1 | 6  | 32 | 20 | t1282 | 1 | 003 | -   | CC5   | -  |
| B0039012 | 73 | M | 2017 | Hradec Kralove   | 0.25  | 2 | 8   | >8   | 0.5  | ≤0.125 | ≤0.004 | 0.125 | >8  | >4           | 1 | 6  | 31 | 20 | t014  | 1 | 003 | -   | CC5   | -  |
| B0039026 | 63 | M | 2017 | Prague           | 0.25  | 2 | 8   | >8   | 1    | 0.25   | 0.008  | 0.25  | >8  | >4           | 1 | 6  | 28 | 21 | t014  | 1 | 003 | -   | CC5   | -  |
| B0039041 | 66 | F | 2017 | Prague           | 0.25  | 2 | 8   | >8   | 0.5  | ≤0.125 | 0.008  | 0.125 | >8  | >4           | 1 | 8  | 26 | 19 | t003  | 1 | 003 | -   | CC5   | -  |
| B0039059 | 56 | M | 2017 | South Bohemian   | 0.25  | 2 | 8   | >8   | >8   | 16     | ≤0.004 | 0.125 | >8  | >4           | 1 | 6  | 30 | 18 | t586  | E | E   | -   | CC5   | -  |
| B0039060 | 63 | M | 2017 | South Bohemian   | 0.25  | 1 | 8   | >8   | 0.5  | ≤0.125 | ≤0.004 | 0.125 | >8  | >4           | 1 | 6  | 29 | 19 | t586  | E | E   | -   | CC5   | -  |
| B0039061 | 55 | F | 2017 | South Bohemian   | 0.125 | 2 | 8   | >8   | >8   | 0.25   | 0.008  | 0.125 | >8  | >4           | 1 | 6  | 27 | 19 | t586  | E | E   | -   | CC5   | -  |
| B0039081 | 70 | M | 2017 | Prague           | 0.25  | 2 | 8   | >8   | 0.5  | 0.5    | 0.008  | 0.125 | >8  | >4           | 1 | 6  | 28 | 21 | t003  | 1 | 003 | -   | CC5   | -  |
| B0039089 | 81 | M | 2017 | Pilsen           | 0.25  | 2 | 8   | >8   | 0.5  | 0.25   | 0.008  | 0.125 | >8  | >4           | 1 | 6  | 28 | 20 | t003  | 1 | 003 | -   | CC5   | -  |
| B0039153 | 71 | F | 2017 | Prague           | 0.125 | 2 | 8   | >8   | 0.5  | 0.5    | ≤0.004 | 0.125 | >8  | >4           | 1 | 6  | 27 | 18 | t003  | 1 | 003 | -   | CC5   | -  |
| B0039159 | 79 | F | 2017 | Usti nad Labem   | 0.25  | 2 | 8   | >8   | 0.5  | ≤0.125 | ≤0.004 | 0.125 | >8  | >4           | 1 | 21 | 28 | 22 | t003  | 1 | 003 | -   | CC5   | -  |
| B0039205 | 44 | M | 2017 | South Bohemian   | 0.5   | 2 | 8   | >8   | 0.5  | 0.25   | 0.008  | 0.125 | >8  | >4           | 1 | 6  | 24 | 19 | t586  | E | E   | -   | CC5   | -  |
| B0039285 | 67 | M | 2017 | Prague           | 0.125 | 2 | 8   | >8   | 0.5  | ≤0.125 | ≤0.004 | 0.125 | >8  | <b>0.25</b>  | 1 | 6  | 27 | 21 | t002  | 1 | 003 | -   | CC5   | -  |
| B0039287 | 91 | F | 2017 | Prague           | 0.25  | 2 | 8   | >8   | 0.5  | ≤0.125 | 0.008  | 0.25  | >8  | >4           | 1 | 6  | 27 | 20 | t003  | 1 | 003 | -   | CC5   | -  |
| B0039300 | 87 | F | 2017 | Pardubice        | 0.25  | 2 | 8   | >8   | 1    | ≤0.125 | ≤0.004 | 0.125 | >8  | >4           | 1 | 6  | 27 | 19 | t014  | 1 | 003 | -   | CC5   | -  |

|          |    |   |      |                  |       |   |     |     |      |        |        |       |     |              |   |    |    |    |       |   |      |     |      |    |
|----------|----|---|------|------------------|-------|---|-----|-----|------|--------|--------|-------|-----|--------------|---|----|----|----|-------|---|------|-----|------|----|
| B0039326 | 83 | F | 2017 | Central Bohemian | 0.125 | 2 | 8   | >8  | 0.5  | ≤0.125 | 0.008  | 0.125 | >8  | >4           | 1 | 6  | 27 | 19 | t586  | E | E    | -   | CC5  | -  |
| B0039411 | 76 | M | 2017 | Prague           | 0.125 | 2 | 8   | >8  | 0.5  | ≤0.125 | 0.008  | 0.125 | >8  | >4           | 1 | 8  | 27 | 24 | t014  | 1 | 003  | -   | CC5  | -  |
| B0039440 | 70 | M | 2017 | Prague           | 0.25  | 2 | 8   | >8  | 0.25 | ≤0.125 | ≤0.004 | 0.125 | >8  | >4           | 1 | 11 | 29 | 20 | t003  | 1 | 003  | -   | CC5  | -  |
| B0039441 | 78 | M | 2017 | Prague           | 0.125 | 2 | 8   | >8  | >8   | ≤0.125 | ≤0.004 | 0.125 | >8  | >4           | 1 | 6  | 29 | 19 | t586  | E | E    | -   | CC5  | -  |
| B0039472 | 75 | F | 2017 | Prague           | 0.25  | 2 | 8   | >8  | 0.25 | ≤0.125 | ≤0.004 | 0.125 | >8  | >4           | 1 | 6  | 27 | 20 | t032  | 3 | 2436 | 22  | CC22 | IV |
| B0039490 | 70 | F | 2017 | Hradec Kralove   | 0.125 | 2 | 8   | >8  | 0.5  | 0.25   | ≤0.004 | 0.25  | >8  | >4           | 1 | 9  | 25 | 22 | t014  | 1 | 003  | -   | CC5  | -  |
| B0039530 | 87 | M | 2017 | Prague           | 0.25  | 2 | 8   | >8  | 0.5  | ≤0.125 | 0.008  | 0.125 | >8  | >4           | 1 | 6  | 25 | 19 | t586  | E | E    | -   | CC5  | -  |
| B0039553 | 79 | M | 2017 | Pilsen           | 0.125 | 2 | 8   | >8  | 0.5  | ≤0.125 | ≤0.004 | 0.125 | >8  | >4           | 1 | 6  | 24 | 19 | t003  | 1 | 003  | -   | CC5  | -  |
| B0039600 | 46 | F | 2017 | Central Bohemian | 0.25  | 2 | 8   | >8  | >8   | ≤0.125 | ≤0.004 | 0.125 | >8  | >4           | 1 | 7  | 26 | 19 | t014  | 1 | 003  | -   | CC5  | -  |
| B0039637 | 76 | F | 2017 | Karlovy Vary     | 0.25  | 2 | 8   | >8  | 0.5  | ≤0.125 | ≤0.004 | 0.125 | >8  | <b>0.25</b>  | 1 | 6  | 24 | 22 | t8006 | 3 | 2436 | -   | CC22 | -  |
| B0039638 | 65 | M | 2017 | Karlovy Vary     | 0.25  | 2 | 8   | >8  | 0.5  | ≤0.125 | 0.008  | 0.125 | >8  | >4           | 1 | 6  | 28 | 24 | t003  | 1 | 003  | -   | CC5  | -  |
| B0039645 | 43 | F | 2017 | Prague           | 0.125 | 2 | 8   | 0.5 | 0.5  | 4      | ≤0.004 | 0.125 | 0.5 | 0.25         | 1 | 14 | 28 | 26 | t223  | 3 | 2436 | -   | CC22 | -  |
| B0039707 | 67 | F | 2017 | Prague           | 0.125 | 2 | 8   | >8  | 0.25 | 0.25   | ≤0.004 | 0.06  | >8  | >4           | 1 | 19 | 31 | 26 | t003  | 1 | 003  | -   | CC5  | -  |
| B0039769 | 82 | M | 2017 | Usti nad Labem   | 0.125 | 1 | 8   | >8  | 1    | ≤0.125 | ≤0.004 | 0.125 | >8  | >4           | 1 | 6  | 26 | 20 | t014  | 1 | 003  | -   | CC5  | -  |
| B0039805 | 74 | M | 2017 | Prague           | 0.125 | 1 | 8   | >8  | 0.25 | ≤0.125 | ≤0.004 | 0.125 | >8  | >4           | 1 | 6  | 27 | 19 | t586  | E | E    | -   | CC5  | -  |
| B0039829 | 61 | M | 2017 | Pilsen           | 0.125 | 2 | 8   | >8  | 1    | 0.25   | 0.008  | 0.125 | >8  | <b>0.25</b>  | 1 | 6  | 25 | 21 | t002  | 1 | 003  | -   | CC5  | -  |
| B0039856 | 94 | M | 2017 | Olomouc          | 0.25  | 2 | 8   | >8  | 0.5  | ≤0.125 | 0.008  | 0.125 | >8  | >4           | 1 | 6  | 25 | 20 | t003  | 1 | 003  | -   | CC5  | -  |
| B0039869 | 80 | F | 2017 | Pardubice        | 0.25  | 2 | 8   | >8  | 0.5  | ≤0.125 | 0.008  | 0.125 | >8  | >4           | 1 | 7  | 26 | 23 | t014  | 1 | 003  | -   | CC5  | -  |
| B0039941 | 73 | F | 2017 | Prague           | 0.25  | 2 | 8   | >8  | 0.5  | ≤0.125 | ≤0.004 | 0.125 | >8  | >4           | 1 | 6  | 26 | 20 | t2379 | E | E    | 225 | CC5  | II |
| B0040008 | 76 | M | 2017 | Pilsen           | 0.125 | 1 | 8   | >8  | 0.5  | ≤0.125 | ≤0.004 | 0.06  | >8  | >4           | 1 | 6  | 33 | 22 | t003  | 1 | 003  | -   | CC5  | -  |
| B0040020 | 85 | M | 2017 | South Moravian   | 0.125 | 1 | 8   | >8  | 0.5  | ≤0.125 | ≤0.004 | 0.125 | >8  | >4           | 1 | 6  | 27 | 21 | t003  | 1 | 003  | -   | CC5  | -  |
| B0040038 | 90 | F | 2017 | South Bohemian   | 0.125 | 2 | 8   | >8  | 0.25 | ≤0.125 | ≤0.004 | 0.06  | >8  | <b>0.125</b> | 1 | 6  | 30 | 21 | t014  | 1 | 003  | -   | CC5  | -  |
| B0040073 | 79 | F | 2017 | Vysocina         | 0.25  | 2 | 8   | >8  | 0.5  | ≤0.125 | 0.008  | 0.125 | >8  | >4           | 1 | 6  | 24 | 19 | t586  | E | E    | -   | CC5  | -  |
| B0040091 | 63 | M | 2017 | Hradec Kralove   | 0.25  | 2 | 8   | >8  | 1    | 0.25   | 0.008  | 0.125 | >8  | >4           | 1 | 6  | 27 | 20 | t003  | 1 | 003  | -   | CC5  | -  |
| B0040100 | 74 | M | 2017 | Prague           | 0.25  | 2 | 8   | >8  | 0.5  | 0.25   | 0.008  | 0.125 | >8  | >4           | 1 | 12 | 23 | 24 | t003  | 1 | 003  | -   | CC5  | -  |
| B0040164 | 62 | M | 2017 | South Bohemian   | 0.125 | 2 | 8   | >8  | 0.25 | ≤0.125 | 0.008  | 0.125 | >8  | <b>0.125</b> | 1 | 6  | 32 | 21 | t014  | 1 | 003  | -   | CC5  | -  |
| B0040177 | 76 | F | 2017 | Hradec Kralove   | 0.125 | 2 | 8   | >8  | 0.5  | ≤0.125 | ≤0.004 | 0.125 | >8  | >4           | 1 | 10 | 27 | 22 | t014  | 1 | 003  | -   | CC5  | -  |
| B0040179 | 86 | F | 2017 | Usti nad Labem   | 0.125 | 1 | 8   | >8  | 0.5  | ≤0.125 | ≤0.004 | 0.125 | >8  | >4           | 1 | 6  | 31 | 22 | t003  | 1 | 003  | -   | CC5  | -  |
| B0040189 | 68 | M | 2017 | Zlin             | 0.125 | 2 | 8   | >8  | 0.25 | ≤0.125 | 0.008  | 0.125 | >8  | >4           | 1 | 6  | 32 | 21 | t003  | 1 | 003  | -   | CC5  | -  |
| B0040208 | 63 | F | 2017 | Prague           | 0.125 | 2 | 8   | >8  | 0.5  | ≤0.125 | ≤0.004 | 0.06  | >8  | >4           | 1 | 6  | 33 | 19 | t014  | 1 | 003  | -   | CC5  | -  |
| B0040209 | 92 | F | 2017 | Prague           | 0.125 | 2 | 8   | >8  | 0.5  | ≤0.125 | ≤0.004 | 0.125 | >8  | <b>0.125</b> | 1 | 6  | 30 | 20 | t003  | 1 | 003  | -   | CC5  | -  |
| B0040210 | 77 | F | 2017 | Prague           | 0.125 | 1 | 8   | >8  | >8   | 0.25   | ≤0.004 | 0.06  | >8  | >4           | 1 | 6  | 30 | 21 | t003  | 1 | 003  | -   | CC5  | -  |
| B0040216 | 57 | F | 2017 | South Bohemian   | 0.125 | 1 | 8   | >8  | 0.25 | ≤0.125 | 0.008  | 0.125 | >8  | >4           | 1 | 6  | 30 | 20 | t1282 | 1 | 003  | -   | CC5  | -  |
| B0040223 | 42 | M | 2017 | Pardubice        | 0.125 | 2 | 8   | >8  | 0.5  | ≤0.125 | ≤0.004 | 0.125 | >8  | >4           | 1 | 6  | 28 | 19 | t586  | E | E    | -   | CC5  | -  |
| B0040230 | 44 | M | 2017 | Pilsen           | 0.06  | 2 | 8   | >8  | 0.5  | ≤0.125 | ≤0.004 | 0.125 | >8  | <b>0.25</b>  | 1 | 13 | 27 | 27 | t2436 | 3 | 2436 | 22  | CC22 | IV |
| B0040258 | 71 | F | 2017 | South Bohemian   | 0.25  | 2 | >64 | >8  | 0.5  | ≤0.125 | 0.008  | 0.125 | >8  | >4           | 1 | 6  | 29 | 20 | t586  | E | E    | -   | CC5  | -  |
| B0040275 | 60 | F | 2017 | Prague           | 0.125 | 2 | 8   | 1   | 0.5  | ≤0.125 | ≤0.004 | 0.06  | 0.5 | 0.125        | 1 | 15 | 30 | 22 | t045  | 1 | 003  | -   | CC5  | -  |
| B0040317 | 65 | M | 2017 | Pilsen           | 0.25  | 2 | 8   | >8  | 0.5  | ≤0.125 | ≤0.004 | 0.125 | >8  | >4           | 1 | 6  | 32 | 21 | t003  | 1 | 003  | -   | CC5  | -  |



|          |    |   |      |                  |       |   |    |     |       |        |        |       |     |              |   |    |    |    |       |   |     |      |      |                |
|----------|----|---|------|------------------|-------|---|----|-----|-------|--------|--------|-------|-----|--------------|---|----|----|----|-------|---|-----|------|------|----------------|
| B0040333 | 53 | M | 2017 | Prague           | 0.125 | 2 | 8  | >8  | 0.5   | ≤0.125 | ≤0.004 | 0.125 | >8  | >4           | 1 | 6  | 29 | 23 | t003  | 1 | 003 | -    | CC5  | -              |
| B0040334 | 61 | F | 2017 | Hradec Kralove   | 0.125 | 1 | 64 | >8  | >8    | ≤0.125 | ≤0.004 | 0.06  | >8  | >4           | 1 | 6  | 29 | 20 | t1282 | 1 | 003 | -    | CC5  | -              |
| B0040344 | 59 | F | 2017 | Vysocina         | 0.125 | 1 | 8  | >8  | >8    | 0.5    | ≤0.004 | 0.06  | >8  | >4           | 2 | 6  | 30 | 18 | t586  | E | E   | -    | CC5  | -              |
| B0040376 | 76 | M | 2017 | South Moravian   | 0.25  | 2 | 8  | >8  | 0.25  | ≤0.125 | ≤0.004 | 0.125 | >8  | <b>0.125</b> | 1 | 6  | 30 | 19 | t586  | E | E   | -    | CC5  | -              |
| B0040398 | 75 | M | 2017 | Liberec          | 0.25  | 2 | 8  | >8  | 1     | 0.25   | 0.008  | 0.125 | >8  | >4           | 1 | 6  | 30 | 20 | t586  | E | E   | -    | CC5  | -              |
| B0040444 | 68 | F | 2017 | Pardubice        | 0.25  | 2 | 8  | >8  | 0.25  | ≤0.125 | ≤0.004 | 0.125 | >8  | <b>0.125</b> | 1 | 6  | 11 | 20 | t586  | E | E   | -    | CC5  | -              |
| B0040462 | 78 | F | 2017 | Prague           | 0.25  | 2 | 16 | >8  | 0.25  | ≤0.125 | ≤0.004 | 0.125 | >8  | >4           | 1 | 6  | 30 | 20 | t014  | 1 | 003 | -    | CC5  | -              |
| B0040608 | 70 | M | 2017 | Prague           | 0.125 | 2 | 8  | >8  | 0.125 | 0.25   | >0.5   | 0.125 | >8  | >4           | 1 | 6  | 28 | 24 | t014  | 1 | 003 | -    | CC5  | -              |
| B0040619 | 50 | M | 2017 | Pilsen           | 0.125 | 2 | 8  | >8  | 0.25  | ≤0.125 | 0.008  | 0.125 | >8  | >4           | 1 | 6  | 29 | 22 | t2379 | E | E   | 225  | CC5  | II             |
| B0040634 | 70 | M | 2017 | Prague           | 0.25  | 2 | 8  | >8  | 0.5   | ≤0.125 | ≤0.004 | 0.125 | >8  | >4           | 1 | 6  | 29 | 22 | t003  | 1 | 003 | -    | CC5  | -              |
| B0040704 | 54 | F | 2017 | Pilsen           | 0.5   | 2 | 16 | >8  | 0.25  | 0.25   | 0.016  | 0.125 | >8  | >4           | 2 | 19 | 30 | 23 | t3195 | 1 | 003 | -    | CC5  | -              |
| B0040711 | 80 | M | 2017 | South Moravian   | 0.25  | 2 | 8  | >8  | 0.5   | ≤0.125 | 0.008  | 0.125 | >8  | >4           | 1 | 6  | 31 | 19 | t586  | E | E   | -    | CC5  | -              |
| B0040720 | 77 | M | 2017 | Hradec Kralove   | 0.125 | 2 | 8  | >8  | 0.5   | ≤0.125 | ≤0.004 | 0.125 | >8  | >4           | 1 | 14 | 25 | 22 | t014  | 1 | 003 | -    | CC5  | -              |
| B0040740 | 60 | M | 2017 | Central Bohemian | 0.25  | 2 | 8  | >8  | 1     | 2      | ≤0.004 | 0.125 | >8  | >4           | 1 | 6  | 25 | 21 | t003  | 1 | 003 | -    | CC5  | -              |
| B0040744 | 62 | M | 2017 | Prague           | 0.125 | 1 | 4  | >8  | >8    | 0.25   | ≤0.004 | 0.125 | >8  | >4           | 1 | 17 | 24 | 23 | t014  | 1 | 003 | 225  | CC5  | II             |
| B0040768 | 87 | F | 2017 | South Moravian   | 0.125 | 1 | 8  | >8  | 0.25  | ≤0.125 | ≤0.004 | 0.125 | >8  | >4           | 1 | 6  | 29 | 20 | t586  | E | E   | -    | CC5  | -              |
| B0040772 | 75 | M | 2017 | Hradec Kralove   | 0.25  | 2 | 8  | >8  | 0.5   | ≤0.125 | ≤0.004 | 0.25  | >8  | >4           | 1 | 6  | 27 | 19 | t003  | 1 | 003 | -    | CC5  | -              |
| B0040776 | 34 | M | 2017 | Pardubice        | 0.25  | 2 | 8  | 1   | >8    | ≤0.125 | 0.008  | 0.125 | 0.5 | 0.125        | 2 | 17 | 27 | 23 | t267  | 6 | NF  | 97   | CC97 | V              |
| B0040788 | 57 | M | 2017 | Prague           | 0.25  | 1 | 64 | 0.5 | 0.5   | 0.5    | ≤0.004 | 0.06  | >8  | >4           | 1 | 14 | 13 | 20 | t437  | S | S   | -    | CC59 | -              |
| B0040792 | 65 | M | 2017 | South Bohemian   | 0.125 | 2 | 64 | >8  | >8    | 0.25   | 0.008  | 0.25  | >8  | >4           | 2 | 6  | 30 | 21 | t586  | E | E   | -    | CC5  | -              |
| B0040820 | 73 | M | 2017 | Pilsen           | 0.25  | 2 | 8  | >8  | 0.25  | 0.25   | 0.008  | 0.125 | >8  | >4           | 1 | 6  | 25 | 20 | t003  | 1 | 003 | -    | CC5  | -              |
| B0040837 | 41 | M | 2017 | Central Bohemian | 0.25  | 2 | 8  | 0.5 | 0.5   | ≤0.125 | 0.008  | 0.125 | 0.5 | 0.125        | 1 | 10 | 26 | 21 | t002  | 1 | 003 | 5688 | CC5  | IV             |
| B0040853 | 64 | F | 2017 | Prague           | 0.25  | 2 | 64 | 0.5 | 0.25  | ≤0.125 | 0.008  | 0.125 | >8  | >4           | 1 | 14 | 12 | 20 | t437  | S | S   | 59   | CC59 | V <sub>T</sub> |
| B0040871 | 72 | F | 2017 | Pardubice        | 0.25  | 2 | 8  | >8  | 0.25  | ≤0.125 | 0.008  | 0.125 | >8  | <b>0.125</b> | 1 | 6  | 25 | 17 | t014  | 1 | 003 | -    | CC5  | -              |
| B0040931 | 86 | M | 2017 | Karlovy Vary     | 0.25  | 2 | 8  | >8  | 0.25  | ≤0.125 | 0.008  | 0.125 | >8  | >4           | 1 | 6  | 27 | 19 | t003  | 1 | 003 | -    | CC5  | -              |
| B0040949 | 29 | M | 2017 | Karlovy Vary     | 0.125 | 2 | 8  | >8  | >8    | 1      | ≤0.004 | 0.125 | >8  | >4           | 1 | 6  | 27 | 19 | t003  | 1 | 003 | 225  | CC5  | II             |
| B0041030 | 61 | F | 2017 | Prague           | 0.25  | 2 | 8  | >8  | 0.5   | ≤0.125 | 0.008  | 0.125 | >8  | <b>0.125</b> | 1 | 6  | 28 | 19 | t002  | 1 | 003 | -    | CC5  | -              |
| B0041037 | 87 | M | 2017 | Hradec Kralove   | 0.25  | 2 | 8  | >8  | 0.25  | ≤0.125 | ≤0.004 | 0.125 | >8  | <b>0.125</b> | 1 | 14 | 27 | 21 | t003  | 1 | 003 | -    | CC5  | -              |
| B0041058 | 42 | M | 2017 | Pardubice        | 0.25  | 2 | 8  | >8  | 0.25  | ≤0.125 | 0.008  | 0.125 | >8  | >4           | 1 | 6  | 27 | 17 | t586  | E | E   | -    | CC5  | -              |
| B0041072 | 77 | F | 2017 | Prague           | 0.25  | 2 | 8  | >8  | 0.5   | ≤0.125 | 0.008  | 0.125 | >8  | >4           | 1 | 6  | 27 | 16 | t893  | 1 | 003 | -    | CC5  | -              |
| B0041098 | 71 | F | 2017 | Pilsen           | 0.25  | 2 | 8  | >8  | 1     | ≤0.125 | ≤0.004 | 0.125 | >8  | >4           | 1 | 6  | 26 | 20 | t014  | 1 | 003 | -    | CC5  | -              |
| B0041127 | 58 | M | 2017 | Central Bohemian | 0.25  | 2 | 8  | >8  | 0.5   | 0.25   | 0.008  | 0.125 | >8  | >4           | 1 | 6  | 27 | 18 | t014  | 1 | 003 | -    | CC5  | -              |
| B0041173 | 67 | F | 2017 | Prague           | 0.25  | 2 | 8  | 0.5 | 0.5   | ≤0.125 | 0.008  | 0.125 | 0.5 | 0.125        | 1 | 11 | 27 | 20 | t304  | 4 | 024 | -    | CC8  | -              |
| B0041198 | 65 | M | 2017 | Pilsen           | 0.25  | 2 | 8  | >8  | 0.25  | 0.25   | ≤0.004 | 0.25  | >8  | >4           | 1 | 6  | 28 | 18 | t003  | 1 | 003 | -    | CC5  | -              |
| B0041209 | 59 | M | 2017 | Vysocina         | 0.25  | 2 | 8  | >8  | 0.5   | ≤0.125 | ≤0.004 | 0.125 | >8  | >4           | 1 | 6  | 25 | 18 | t586  | E | E   | -    | CC5  | -              |
| B0041215 | 63 | M | 2017 | Liberec          | 0.25  | 2 | 8  | >8  | 0.5   | ≤0.125 | 0.008  | 0.125 | >8  | >4           | 1 | 8  | 28 | 19 | t003  | 1 | 003 | -    | CC5  | -              |
| B0041237 | 71 | F | 2017 | South Bohemian   | 0.25  | 2 | 8  | >8  | 0.25  | ≤0.125 | ≤0.004 | 0.125 | >8  | >4           | 1 | 6  | 22 | 17 | t586  | E | E   | -    | CC5  | -              |
| B0041259 | 83 | F | 2017 | Usti nad Labem   | 0.25  | 2 | 8  | >8  | 0.5   | ≤0.125 | ≤0.004 | 0.125 | >8  | >4           | 1 | 6  | 26 | 19 | t003  | 1 | 003 | -    | CC5  | -              |

|          |    |   |      |                  |       |   |     |     |      |        |        |       |     |              |     |    |    |    |       |   |     |     |     |    |
|----------|----|---|------|------------------|-------|---|-----|-----|------|--------|--------|-------|-----|--------------|-----|----|----|----|-------|---|-----|-----|-----|----|
| B0041283 | 83 | M | 2017 | South Bohemian   | 0.25  | 2 | 8   | >8  | >8   | 0.5    | >0.5   | 0.06  | >8  | >4           | 1   | 6  | 27 | 18 | t586  | E | E   | -   | CC5 | -  |
| B0041287 | 83 | M | 2017 | South Bohemian   | 0.25  | 2 | 8   | >8  | 0.5  | 0.25   | 0.008  | 0.125 | 0.5 | 0.25         | 1   | 6  | 26 | 19 | t6428 | 1 | 003 | -   | CC5 | -  |
| B0041290 | 81 | F | 2017 | South Bohemian   | 0.25  | 2 | 8   | >8  | 0.5  | ≤0.125 | 0.008  | 0.125 | >8  | >4           | 1   | 6  | 23 | 17 | t586  | E | E   | -   | CC5 | -  |
| B0041291 | 74 | M | 2017 | South Bohemian   | 0.25  | 2 | 8   | >8  | >8   | 0.25   | 0.008  | 0.125 | >8  | >4           | 1   | 6  | 8  | 17 | t586  | E | E   | -   | CC5 | -  |
| B0041324 | 67 | F | 2017 | South Moravian   | 0.25  | 2 | 8   | >8  | 0.5  | ≤0.125 | 0.008  | 0.125 | >8  | >4           | 1   | 6  | 26 | 18 | t586  | E | E   | -   | CC5 | -  |
| B0041370 | 83 | F | 2017 | Hradec Kralove   | 0.25  | 2 | 8   | >8  | 0.25 | ≤0.125 | 0.008  | 0.125 | >8  | <b>0.25</b>  | 1   | 6  | 26 | 18 | t002  | 1 | 003 | -   | CC5 | -  |
| B0041377 | 68 | M | 2017 | Hradec Kralove   | 0.25  | 2 | 8   | >8  | 0.5  | ≤0.125 | 0.008  | 2     | >8  | <b>0.125</b> | 2   | 6  | 25 | 18 | t014  | 1 | 003 | -   | CC5 | -  |
| B0041426 | 66 | M | 2017 | Central Bohemian | 0.25  | 2 | 8   | >8  | 0.25 | ≤0.125 | ≤0.004 | 0.125 | >8  | >4           | 1   | 6  | 27 | 23 | t003  | 1 | 003 | -   | CC5 | -  |
| B0041437 | 77 | M | 2017 | South Bohemian   | 0.25  | 2 | 8   | >8  | >8   | 0.25   | 0.008  | 0.125 | >8  | >4           | 1   | 6  | 26 | 20 | t3195 | 1 | 003 | -   | CC5 | -  |
| B0041486 | 74 | F | 2017 | Central Bohemian | 0.25  | 2 | 8   | >8  | 0.25 | ≤0.125 | 0.008  | 0.125 | >8  | <b>0.25</b>  | 1   | 6  | 28 | 19 | t002  | 1 | 003 | -   | CC5 | -  |
| B0041503 | 70 | F | 2017 | Prague           | 0.25  | 2 | >64 | >8  | 0.25 | ≤0.125 | ≤0.004 | 0.125 | >8  | >4           | 1   | 6  | 28 | 18 | t586  | E | E   | -   | CC5 | -  |
| B0041518 | 68 | M | 2017 | Pardubice        | 0.125 | 2 | 8   | >8  | 0.25 | ≤0.125 | ≤0.004 | 2     | >8  | <b>0.125</b> | 1   | 6  | 29 | 19 | t014  | 1 | 003 | -   | CC5 | -  |
| B0041539 | 83 | M | 2017 | South Bohemian   | 0.125 | 2 | 8   | >8  | 0.25 | ≤0.125 | ≤0.004 | 0.125 | >8  | >4           | 1   | 11 | 26 | 21 | t014  | 1 | 003 | -   | CC5 | -  |
| B0041540 | 69 | M | 2017 | South Bohemian   | 0.25  | 2 | 8   | >8  | >8   | 0.25   | ≤0.004 | 0.125 | >8  | >4           | 1   | 6  | 9  | 20 | t586  | E | E   | -   | CC5 | -  |
| B0041541 | 48 | F | 2017 | South Bohemian   | 0.25  | 2 | 8   | >8  | 0.5  | ≤0.125 | ≤0.004 | 0.125 | >8  | >4           | 1   | 6  | 26 | 20 | t586  | E | E   | -   | CC5 | -  |
| B0041575 | 74 | M | 2017 | South Moravian   | 0.25  | 2 | 8   | >8  | 0.25 | ≤0.125 | ≤0.004 | 0.25  | >8  | >4           | 1   | 6  | 27 | 20 | t003  | 1 | 003 | -   | CC5 | -  |
| B0041594 | 40 | M | 2017 | Pilsen           | 0.25  | 2 | 8   | >8  | 0.5  | ≤0.125 | 0.008  | 0.125 | >8  | >4           | 1   | 6  | 28 | 20 | t014  | 1 | 003 | -   | CC5 | -  |
| B0041612 | 44 | M | 2017 | Prague           | 0.125 | 1 | 8   | >8  | >8   | 16     | 0.008  | 0.125 | >8  | >4           | 1   | 6  | 26 | 16 | t041  | 1 | 003 | -   | CC5 | -  |
| B0041626 | 40 | M | 2017 | Central Bohemian | 0.25  | 2 | 8   | >8  | >8   | 1      | ≤0.004 | 0.125 | >8  | >4           | 1   | 6  | 28 | 20 | t014  | 1 | 003 | -   | CC5 | -  |
| B0041668 | 84 | M | 2017 | Central Bohemian | 0.25  | 2 | 8   | >8  | 0.25 | ≤0.125 | 0.008  | 0.125 | >8  | >4           | 1   | 6  | 27 | 17 | t586  | E | E   | -   | CC5 | -  |
| B0041708 | 70 | M | 2017 | Liberec          | 0.125 | 2 | 8   | >8  | 0.5  | ≤0.125 | 0.016  | 0.25  | >8  | >4           | 1   | 6  | 29 | 20 | t586  | E | E   | -   | CC5 | -  |
| B0041713 | 70 | F | 2017 | Usti nad Labem   | 0.25  | 2 | 8   | >8  | 0.25 | ≤0.125 | 0.008  | 0.125 | >8  | >4           | 0.5 | 6  | 30 | 18 | t003  | 1 | 003 | -   | CC5 | -  |
| B0041753 | 53 | F | 2017 | Prague           | 0.25  | 2 | 8   | >8  | 0.25 | ≤0.125 | 0.008  | 0.125 | >8  | >4           | 0.5 | 6  | 26 | 19 | t003  | 1 | 003 | -   | CC5 | -  |
| B0041763 | 70 | M | 2017 | Hradec Kralove   | 0.125 | 1 | >64 | >8  | >8   | ≤0.125 | ≤0.004 | 0.06  | >8  | <b>0.125</b> | 1   | 6  | 31 | 18 | t002  | 1 | 003 | -   | CC5 | -  |
| B0041781 | 83 | F | 2017 | South Moravian   | 0.125 | 1 | >64 | >8  | 0.25 | ≤0.125 | >0.5   | 0.125 | >8  | >4           | 1   | 6  | 28 | 17 | t003  | 1 | 003 | 225 | CC5 | II |
| B0041792 | 72 | M | 2017 | Pilsen           | 0.25  | 2 | 8   | >8  | 0.5  | 0.25   | 0.008  | 0.125 | >8  | >4           | 1   | 6  | 25 | 20 | t014  | 1 | 003 | -   | CC5 | -  |
| B0041798 | 79 | F | 2017 | Olomouc          | 0.25  | 2 | 8   | >8  | 0.25 | ≤0.125 | 0.008  | 0.125 | >8  | >4           | 0.5 | 6  | 27 | 18 | t003  | 1 | 003 | -   | CC5 | -  |
| B0041805 | 67 | M | 2017 | Olomouc          | 0.25  | 2 | 8   | >8  | 0.25 | ≤0.125 | 0.008  | 0.125 | >8  | >4           | 0.5 | 7  | 28 | 17 | t003  | 1 | 003 | -   | CC5 | -  |
| B0041809 | 72 | M | 2017 | Central Bohemian | 0.125 | 2 | 4   | >8  | 0.25 | ≤0.125 | 0.008  | 0.125 | >8  | <b>0.25</b>  | 1   | 6  | 29 | 17 | t002  | 1 | 003 | -   | CC5 | -  |
| B0041818 | 82 | M | 2017 | Prague           | 0.125 | 2 | 4   | 0.5 | 0.25 | ≤0.125 | 0.008  | 0.125 | >8  | <b>0.125</b> | 1   | 10 | 28 | 22 | t127  | S | S   | -   | CC1 | -  |
| B0041826 | 74 | F | 2017 | Prague           | 0.25  | 2 | 8   | >8  | >8   | 0.5    | 0.008  | 0.125 | >8  | >4           | 1   | 6  | 27 | 19 | t586  | E | E   | -   | CC5 | -  |
| B0041828 | 83 | F | 2017 | Vysocina         | 0.125 | 1 | 8   | >8  | 0.5  | ≤0.125 | ≤0.004 | 0.125 | >8  | >4           | 0.5 | 13 | 25 | 22 | t003  | 1 | 003 | -   | CC5 | -  |
| B0041829 | 78 | F | 2017 | Vysocina         | 0.125 | 2 | 8   | >8  | 0.25 | ≤0.125 | 0.008  | 0.125 | >8  | >4           | 0.5 | 6  | 27 | 18 | t003  | 1 | 003 | -   | CC5 | -  |
| B0041892 | 83 | M | 2017 | Prague           | 0.125 | 2 | 4   | >8  | 0.25 | ≤0.125 | 0.008  | 0.125 | 0.5 | 0.125        | 0.5 | 14 | 28 | 22 | t1282 | 1 | 003 | -   | CC5 | -  |
| B0041931 | 69 | M | 2017 | Vysocina         | 0.125 | 2 | 8   | >8  | 0.5  | ≤0.125 | 0.008  | 0.125 | >8  | >4           | 0.5 | 6  | 28 | 19 | t003  | 1 | 003 | -   | CC5 | -  |
| B0041954 | 65 | F | 2017 | Hradec Kralove   | 0.125 | 2 | >64 | >8  | 0.5  | ≤0.125 | 0.008  | 0.125 | >8  | >4           | 0.5 | 6  | 28 | 21 | t014  | 1 | 003 | -   | CC5 | -  |
| B0041969 | 85 | F | 2017 | South Moravian   | 0.125 | 2 | 8   | >8  | 0.25 | 0.5    | ≤0.004 | 0.125 | >8  | >4           | 0.5 | 6  | 27 | 18 | t003  | 1 | 003 | -   | CC5 | -  |
| B0042027 | 86 | M | 2017 | Vysocina         | 0.125 | 2 | 8   | >8  | 0.25 | ≤0.125 | 0.008  | 0.125 | >8  | >4           | 0.5 | 6  | 28 | 20 | t003  | 1 | 003 | -   | CC5 | -  |

|          |    |   |      |                  |       |   |    |     |       |        |        |       |    |              |     |    |    |    |       |   |     |   |     |    |
|----------|----|---|------|------------------|-------|---|----|-----|-------|--------|--------|-------|----|--------------|-----|----|----|----|-------|---|-----|---|-----|----|
| B0042044 | 70 | M | 2017 | Vysocina         | 0.125 | 2 | 8  | >8  | 0.25  | ≤0.125 | 0.008  | 0.25  | >8 | >4           | 0.5 | 6  | 27 | 19 | t003  | 1 | 003 | - | CC5 | -  |
| B0042094 | 80 | F | 2017 | Olomouc          | 0.125 | 1 | 8  | >8  | 0.25  | ≤0.125 | ≤0.004 | 0.125 | >8 | >4           | 0.5 | 6  | 27 | 19 | t003  | 1 | 003 | - | CC5 | -  |
| B0042118 | 68 | M | 2017 | Prague           | 0.125 | 2 | 4  | 0.5 | 0.25  | ≤0.125 | 0.008  | 0.125 | >8 | <b>0.125</b> | 1   | 6  | 9  | 20 | t127  | S | S   | 1 | CC1 | IV |
| B0042119 | 61 | M | 2017 | Prague           | 0.125 | 2 | 8  | >8  | >8    | ≤0.125 | ≤0.004 | 0.125 | >8 | >4           | 0.5 | 6  | 11 | 21 | t014  | 1 | 003 | - | CC5 | -  |
| B0042160 | 68 | M | 2017 | South Bohemian   | 0.125 | 2 | 8  | >8  | >8    | 1      | >0.5   | 0.25  | >8 | >4           | 1   | 6  | 27 | 19 | t586  | E | E   | - | CC5 | -  |
| B0042161 | 85 | F | 2017 | South Bohemian   | 0.25  | 2 | 8  | >8  | >8    | 0.25   | ≤0.004 | 0.125 | >8 | >4           | 1   | 6  | 28 | 18 | t586  | E | E   | - | CC5 | -  |
| B0042163 | 74 | F | 2017 | South Bohemian   | 0.125 | 2 | 8  | >8  | >8    | 0.25   | ≤0.004 | 0.125 | >8 | >4           | 1   | 6  | 29 | 19 | t586  | E | E   | - | CC5 | -  |
| B0042170 | 79 | F | 2017 | South Bohemian   | 0.25  | 2 | 8  | >8  | >8    | 0.25   | ≤0.004 | 0.125 | >8 | >4           | 1   | 6  | 8  | 19 | t586  | E | E   | - | CC5 | -  |
| B0042176 | 34 | F | 2017 | South Bohemian   | 0.125 | 2 | 8  | >8  | 0.25  | ≤0.125 | 0.008  | 0.125 | >8 | >4           | 1   | 6  | 26 | 20 | t003  | 1 | 003 | - | CC5 | -  |
| B0042177 | 70 | M | 2017 | South Bohemian   | 0.25  | 2 | 8  | >8  | 0.25  | ≤0.125 | ≤0.004 | 0.125 | >8 | >4           | 0.5 | 6  | 28 | 18 | t003  | 1 | 003 | - | CC5 | -  |
| B0042199 | 62 | F | 2017 | Prague           | 0.125 | 2 | 4  | 2   | 0.5   | ≤0.125 | ≤0.004 | 0.125 | >8 | <b>0.125</b> | 0.5 | 15 | 10 | 24 | t127  | S | S   | - | CC1 | -  |
| B0042270 | 86 | F | 2017 | Vysocina         | 0.25  | 2 | 8  | >8  | 0.5   | ≤0.125 | 0.008  | 0.125 | >8 | >4           | 0.5 | 9  | 24 | 19 | t003  | 1 | 003 | - | CC5 | -  |
| B0042284 | 83 | F | 2017 | Hradec Kralove   | 0.125 | 1 | 8  | >8  | 0.25  | ≤0.125 | 0.008  | 0.125 | >8 | >4           | 0.5 | 6  | 27 | 19 | t003  | 1 | 003 | - | CC5 | -  |
| B0042289 | 86 | F | 2017 | Prague           | 0.25  | 2 | 8  | >8  | 0.125 | ≤0.125 | 0.008  | 0.125 | >8 | >4           | 0.5 | 6  | 25 | 21 | t151  | 1 | 003 | - | CC5 | -  |
| B0042321 | 68 | M | 2017 | Pilsen           | 0.125 | 2 | 8  | >8  | 0.25  | ≤0.125 | 0.008  | 0.125 | >8 | >4           | 0.5 | 6  | 27 | 19 | t003  | 1 | 003 | - | CC5 | -  |
| B0042384 | 69 | F | 2017 | Vysocina         | 0.125 | 2 | 8  | >8  | 0.25  | ≤0.125 | ≤0.004 | 0.125 | >8 | <b>0.25</b>  | 0.5 | 6  | 24 | 19 | t002  | 1 | 003 | 5 | CC5 | II |
| B0042411 | 66 | M | 2018 | Olomouc          | 0.25  | 2 | 8  | >8  | 0.25  | ≤0.125 | 0.008  | 0.125 | >8 | >4           | 0.5 | 7  | 27 | 19 | t003  | 1 | 003 | - | CC5 | -  |
| B0042484 | 72 | F | 2017 | Karlovy Vary     | 0.125 | 1 | 8  | >8  | 1     | ≤0.125 | >0.5   | 0.06  | >8 | >4           | 1   | 6  | 32 | 18 | t014  | 1 | 003 | - | CC5 | -  |
| B0042509 | 53 | M | 2017 | Karlovy Vary     | 0.125 | 2 | 8  | >8  | 0.25  | ≤0.125 | ≤0.004 | 0.125 | >8 | >4           | 0.5 | 6  | 28 | 20 | t014  | 1 | 003 | - | CC5 | -  |
| B0042602 | 77 | M | 2018 | Pardubice        | 0.25  | 2 | 8  | >8  | 0.5   | 0.25   | 0.008  | 0.125 | >8 | >4           | 1   | 6  | 30 | 20 | t014  | 1 | 003 | - | CC5 | -  |
| B0042606 | 64 | M | 2017 | South Bohemian   | 0.25  | 2 | 8  | >8  | 0.25  | ≤0.125 | 0.008  | 0.25  | >8 | >4           | 0.5 | 6  | 29 | 18 | t586  | E | E   | - | CC5 | -  |
| B0042608 | 72 | M | 2017 | South Bohemian   | 0.25  | 2 | 8  | >8  | >8    | 0.5    | 0.016  | 0.125 | >8 | >4           | 1   | 6  | 9  | 17 | t586  | E | E   | - | CC5 | -  |
| B0042633 | 73 | M | 2018 | Pilsen           | 0.25  | 2 | 8  | >8  | 0.25  | ≤0.125 | 0.008  | 0.125 | >8 | >4           | 0.5 | 6  | 29 | 23 | t003  | 1 | 003 | - | CC5 | -  |
| B0042647 | 62 | M | 2017 | Prague           | 0.125 | 2 | 8  | >8  | 0.25  | ≤0.125 | 0.008  | 0.125 | >8 | <b>0.25</b>  | 0.5 | 6  | 27 | 17 | t586  | E | E   | - | CC5 | -  |
| B0042704 | 47 | M | 2018 | Usti nad Labem   | 0.25  | 4 | 8  | >8  | 0.5   | ≤0.125 | 0.008  | 0.25  | >8 | >4           | 0.5 | 6  | 27 | 18 | t003  | 1 | 003 | - | CC5 | -  |
| B0042705 | 80 | F | 2018 | Usti nad Labem   | 0.25  | 2 | 8  | >8  | 0.5   | ≤0.125 | 0.008  | 0.125 | >8 | >4           | 1   | 6  | 26 | 18 | t003  | 1 | 003 | - | CC5 | -  |
| B0042717 | 48 | M | 2018 | Prague           | 0.125 | 2 | 8  | >8  | >8    | ≤0.125 | 0.06   | 4     | >8 | >4           | 0.5 | 6  | 13 | 18 | t003  | 1 | 003 | - | CC5 | -  |
| B0042732 | 71 | M | 2018 | South Bohemian   | 0.125 | 1 | 4  | >8  | 0.5   | ≤0.125 | ≤0.004 | 0.125 | >8 | >4           | 0.5 | 6  | 30 | 19 | t003  | 1 | 003 | - | CC5 | -  |
| B0042736 | 46 | M | 2018 | Hradec Kralove   | 0.125 | 2 | 64 | >8  | >8    | ≤0.125 | ≤0.004 | 0.125 | >8 | >4           | 0.5 | 8  | 29 | 17 | t1282 | 1 | 003 | - | CC5 | -  |
| B0042775 | 73 | F | 2018 | Vysocina         | 0.25  | 2 | 8  | >8  | 0.25  | ≤0.125 | 0.008  | 0.125 | >8 | >4           | 0.5 | 6  | 31 | 19 | t003  | 1 | 003 | - | CC5 | -  |
| B0042783 | 77 | M | 2018 | South Bohemian   | 0.125 | 2 | 8  | >8  | 0.25  | ≤0.125 | 0.008  | 0.125 | >8 | >4           | 0.5 | 6  | 30 | 19 | t586  | E | E   | - | CC5 | -  |
| B0042803 | 66 | F | 2018 | Pardubice        | 0.125 | 2 | 8  | >8  | 0.5   | 0.25   | 0.008  | 0.125 | >8 | >4           | 1   | 6  | 31 | 21 | t014  | 1 | 003 | - | CC5 | -  |
| B0042834 | 71 | M | 2018 | South Moravian   | 0.125 | 1 | 8  | >8  | 0.25  | ≤0.125 | 0.008  | 0.125 | >8 | >4           | 1   | 6  | 33 | 19 | t003  | 1 | 003 | - | CC5 | -  |
| B0042934 | 71 | M | 2018 | Central Bohemian | 0.125 | 1 | 4  | >8  | 0.125 | ≤0.125 | ≤0.004 | 0.125 | >8 | >4           | 0.5 | 6  | 29 | 18 | t003  | 1 | 003 | - | CC5 | -  |
| B0042966 | 60 | M | 2018 | Pardubice        | 0.125 | 2 | 8  | >8  | 0.25  | 16     | 0.008  | 0.125 | >8 | >4           | 0.5 | 6  | 14 | 15 | t014  | 1 | 003 | - | CC5 | -  |
| B0042983 | 64 | M | 2018 | Hradec Kralove   | 0.125 | 2 | 8  | >8  | 0.25  | ≤0.125 | ≤0.004 | 0.25  | >8 | >4           | 0.5 | 6  | 26 | 19 | t014  | 1 | 003 | - | CC5 | -  |
| B0042987 | 88 | M | 2018 | Prague           | 0.125 | 2 | 8  | >8  | 0.5   | ≤0.125 | 0.008  | 0.125 | >8 | >4           | 0.5 | 6  | 28 | 18 | t003  | 1 | 003 | - | CC5 | -  |
| B0043059 | 67 | M | 2018 | Usti nad Labem   | 0.125 | 1 | 8  | >8  | 0.25  | ≤0.125 | ≤0.004 | 0.06  | >8 | >4           | 0.5 | 7  | 29 | 18 | t003  | 1 | 003 | - | CC5 | -  |
| B0043071 | 75 | M | 2018 | Vysocina         | 0.25  | 2 | 8  | >8  | 0.25  | ≤0.125 | 0.008  | 0.25  | >8 | >4           | 0.5 | 6  | 28 | 18 | t586  | E | E   | - | CC5 | -  |

|          |    |   |      |                  |       |   |     |     |      |        |        |       |      |              |     |    |    |    |        |   |     |     |       |    |
|----------|----|---|------|------------------|-------|---|-----|-----|------|--------|--------|-------|------|--------------|-----|----|----|----|--------|---|-----|-----|-------|----|
| B0043091 | 61 | M | 2018 | Pilsen           | 0.25  | 2 | 8   | >8  | 0.25 | ≤0.125 | 0.008  | 0.25  | >8   | >4           | 0.5 | 6  | 29 | 14 | t003   | 1 | 003 | -   | CC5   | -  |
| B0043093 | 69 | M | 2018 | Pilsen           | 0.25  | 2 | 8   | >8  | 0.25 | ≤0.125 | 0.008  | 0.25  | >8   | >4           | 1   | 14 | 30 | 19 | t014   | 1 | 003 | -   | CC5   | -  |
| B0043133 | 72 | F | 2018 | Prague           | 0.125 | 2 | >64 | >8  | 0.5  | ≤0.125 | ≤0.004 | 0.125 | >8   | >4           | 0.5 | 6  | 28 | 19 | t586   | E | E   | -   | CC5   | -  |
| B0043144 | 66 | M | 2018 | Central Bohemian | 0.25  | 2 | 4   | >8  | 0.5  | ≤0.125 | 0.008  | >4    | >8   | <b>0.25</b>  | 1   | 6  | 27 | 18 | t002   | 1 | 003 | -   | CC5   | -  |
| B0043151 | 89 | F | 2018 | South Bohemian   | 0.25  | 2 | 8   | >8  | 0.5  | ≤0.125 | 0.008  | 0.125 | >8   | >4           | 0.5 | 6  | 24 | 19 | t003   | 1 | 003 | -   | CC5   | -  |
| B0043165 | 82 | M | 2018 | South Bohemian   | 0.25  | 2 | 8   | >8  | >8   | 0.25   | ≤0.004 | 0.125 | >8   | >4           | 0.5 | 6  | 11 | 18 | t586   | E | E   | 225 | CC5   | II |
| B0043167 | 81 | F | 2018 | South Bohemian   | 0.25  | 1 | 8   | >8  | >8   | 0.25   | ≤0.004 | 0.06  | >8   | >4           | 0.5 | 6  | 12 | 19 | t586   | E | E   | -   | CC5   | -  |
| B0043199 | 60 | M | 2018 | Pilsen           | 0.25  | 2 | 8   | >8  | 0.25 | ≤0.125 | 0.008  | 0.25  | >8   | <b>0.25</b>  | 1   | 6  | 27 | 20 | t003   | 1 | 003 | -   | CC5   | -  |
| B0043212 | 84 | M | 2018 | Vysocina         | 0.25  | 2 | 8   | >8  | 0.5  | 0.5    | ≤0.004 | 0.125 | 0.5  | >4           | 0.5 | 19 | 7  | 23 | t034   | 2 | 011 | 398 | CC398 | V  |
| B0043218 | 62 | M | 2018 | Prague           | 0.125 | 2 | 8   | >8  | 0.25 | ≤0.125 | ≤0.004 | 0.125 | >8   | >4           | 0.5 | 14 | 29 | 21 | t003   | 1 | 003 | -   | CC5   | -  |
| B0043319 | 74 | M | 2018 | Olomouc          | 0.125 | 2 | 8   | >8  | 0.25 | ≤0.125 | ≤0.004 | 0.125 | >8   | >4           | 0.5 | 11 | 27 | 19 | t003   | 1 | 003 | -   | CC5   | -  |
| B0043465 | 58 | M | 2018 | Central Bohemian | 0.25  | 2 | 8   | >8  | 0.5  | ≤0.125 | 0.008  | 0.25  | >8   | >4           | 1   | 8  | 28 | 19 | t014   | 1 | 003 | -   | CC5   | -  |
| B0043489 | 84 | F | 2018 | Prague           | 0.25  | 2 | 16  | >8  | 0.5  | ≤0.125 | 0.008  | 0.25  | >8   | >4           | 1   | 6  | 27 | 18 | t586   | E | E   | -   | CC5   | -  |
| B0043541 | 66 | M | 2018 | Prague           | 0.125 | 2 | 4   | 0.5 | 0.5  | ≤0.125 | 0.008  | 0.125 | >8   | >4           | 1   | 13 | 10 | 21 | t127   | S | S   | -   | CC1   | -  |
| B0043542 | 79 | M | 2018 | Prague           | 0.25  | 2 | 8   | >8  | 0.5  | ≤0.125 | 0.008  | 0.25  | >8   | >4           | 1   | 6  | 26 | 17 | t586   | E | E   | -   | CC5   | -  |
| B0043557 | 62 | M | 2018 | Zlin             | 0.25  | 2 | 8   | >8  | 0.5  | 0.25   | 0.008  | 0.25  | >8   | >4           | 1   | 6  | 28 | 17 | t003   | 1 | 003 | -   | CC5   | -  |
| B0043559 | 80 | F | 2018 | Zlin             | 0.25  | 2 | 8   | >8  | 0.5  | 0.25   | 0.008  | 0.125 | >8   | >4           | 1   | 8  | 27 | 19 | t003   | 1 | 003 | -   | CC5   | -  |
| B0043561 | 73 | M | 2018 | Zlin             | 0.25  | 2 | 8   | >8  | 0.5  | 0.25   | ≤0.004 | 0.125 | >8   | >4           | 1   | 6  | 29 | 17 | t003   | 1 | 003 | -   | CC5   | -  |
| B0043585 | 74 | F | 2018 | Usti nad Labem   | 0.25  | 2 | 8   | >8  | 0.5  | ≤0.125 | 0.008  | 0.125 | >8   | >4           | 0.5 | 11 | 30 | 18 | t003   | 1 | 003 | -   | CC5   | -  |
| B0043602 | 92 | F | 2018 | Prague           | 0.25  | 2 | 8   | >8  | 0.5  | ≤0.125 | 0.008  | 0.125 | >8   | >4           | 0.5 | 6  | 31 | 20 | t3560  | 1 | 003 | -   | CC5   | -  |
| B0043638 | 65 | M | 2018 | Central Bohemian | 0.25  | 2 | 8   | >8  | 0.5  | ≤0.125 | 0.008  | 0.125 | >8   | <b>0.25</b>  | 0.5 | 7  | 27 | 19 | t1227  | 1 | 003 | -   | CC5   | -  |
| B0043640 | 66 | M | 2018 | Liberec          | 0.25  | 2 | >64 | >8  | >8   | ≤0.125 | ≤0.004 | 0.06  | >8   | <b>0.125</b> | 0.5 | 9  | 28 | 17 | t002   | 1 | 003 | -   | CC5   | -  |
| B0043643 | 73 | M | 2018 | South Moravian   | 0.125 | 2 | 4   | >8  | 0.5  | ≤0.125 | ≤0.004 | 0.125 | >8   | <b>0.125</b> | 0.5 | 8  | 28 | 23 | t18037 | 1 | 003 | -   | CC5   | -  |
| B0043674 | 9  | F | 2018 | Prague           | 0.25  | 2 | 8   | >8  | 0.5  | ≤0.125 | 0.008  | 0.125 | >8   | 0.125        | 1   | 15 | 30 | 19 | t008   | 4 | 024 | 8   | CC8   | IV |
| B0043710 | 64 | F | 2018 | Prague           | 0.125 | 1 | 8   | >8  | 0.5  | >16    | 0.008  | >4    | >8   | >4           | 2   | 6  | 11 | 18 | t003   | 1 | 003 | -   | CC5   | -  |
| B0043731 | 62 | M | 2018 | Central Bohemian | 0.25  | 2 | 8   | >8  | 0.25 | ≤0.125 | 0.008  | 4     | >8   | <b>0.25</b>  | 1   | 6  | 30 | 17 | t002   | 1 | 003 | -   | CC5   | -  |
| B0043746 | 73 | M | 2018 | Hradec Kralove   | 0.125 | 1 | 4   | 0.5 | 0.5  | 0.25   | 0.008  | 0.06  | 0.25 | 0.125        | 1   | 12 | 25 | 21 | t015   | 5 | NF  | 45  | CC45  | IV |
| B0043756 | 82 | F | 2018 | Prague           | 0.125 | 1 | 8   | >8  | 0.25 | ≤0.125 | ≤0.004 | 0.25  | >8   | >4           | 0.5 | 6  | 30 | 18 | t586   | E | E   | -   | CC5   | -  |
| B0043761 | 80 | M | 2018 | Prague           | 0.25  | 2 | 8   | >8  | 0.5  | 0.25   | 0.008  | 0.125 | >8   | >4           | 0.5 | 8  | 29 | 19 | t003   | 1 | 003 | -   | CC5   | -  |
| B0043782 | 62 | M | 2018 | Pardubice        | 0.125 | 2 | 4   | >8  | 0.5  | ≤0.125 | ≤0.004 | 0.125 | >8   | <b>0.25</b>  | 0.5 | 6  | 29 | 19 | t002   | 1 | 003 | -   | CC5   | -  |
| B0043791 | 70 | F | 2018 | South Moravian   | 0.125 | 1 | 8   | >8  | 0.25 | ≤0.125 | 0.008  | 0.125 | >8   | >4           | 0.5 | 6  | 29 | 19 | t003   | 1 | 003 | -   | CC5   | -  |
| B0043803 | 63 | M | 2018 | Prague           | 0.25  | 2 | 8   | >8  | 0.5  | >16    | ≤0.004 | 0.25  | >8   | >4           | 1   | 6  | 31 | 19 | t003   | 1 | 003 | -   | CC5   | -  |
| B0043814 | 67 | F | 2018 | Pardubice        | 0.25  | 2 | 8   | >8  | 0.5  | 0.25   | ≤0.004 | 0.125 | >8   | >4           | 1   | 6  | 30 | 19 | t003   | 1 | 003 | -   | CC5   | -  |
| B0043844 | 60 | M | 2018 | Prague           | 0.25  | 2 | 8   | >8  | 0.25 | ≤0.125 | >0.5   | 0.25  | >8   | >4           | 1   | 6  | 30 | 18 | t586   | E | E   | -   | CC5   | -  |
| B0043848 | 38 | M | 2018 | Prague           | 0.25  | 2 | 8   | >8  | 0.5  | 0.25   | 0.008  | 0.125 | >8   | >4           | 1   | 13 | 29 | 20 | t008   | 4 | 024 | 8   | CC8   | IV |
| B0043855 | 38 | M | 2018 | Vysocina         | 0.125 | 2 | 8   | >8  | 0.5  | ≤0.125 | 0.008  | 0.125 | >8   | >4           | 1   | 6  | 29 | 19 | t014   | 1 | 003 | -   | CC5   | -  |
| B0043901 | 81 | M | 2018 | Usti nad Labem   | 0.25  | 2 | 8   | >8  | 0.5  | ≤0.125 | 0.008  | 0.125 | >8   | >4           | 0.5 | 6  | 30 | 18 | t003   | 1 | 003 | -   | CC5   | -  |
| B0043904 | 64 | F | 2018 | Usti nad Labem   | 0.25  | 2 | 8   | >8  | 1    | ≤0.125 | 0.008  | 0.125 | >8   | >4           | 0.5 | 6  | 29 | 19 | t003   | 1 | 003 | -   | CC5   | -  |
| B0043907 | 62 | M | 2018 | Usti nad Labem   | 0.125 | 1 | 8   | >8  | 0.5  | ≤0.125 | ≤0.004 | 0.125 | >8   | >4           | 0.5 | 15 | 29 | 22 | t003   | 1 | 003 | -   | CC5   | -  |
| B0043909 | 65 | F | 2018 | Usti nad Labem   | 0.25  | 2 | 8   | >8  | 0.5  | ≤0.125 | 0.008  | 0.125 | >8   | >4           | 0.5 | 7  | 28 | 20 | t003   | 1 | 003 | -   | CC5   | -  |

|          |    |   |      |                  |       |   |    |       |      |        |        |       |     |              |     |    |    |    |       |   |     |    |       |    |
|----------|----|---|------|------------------|-------|---|----|-------|------|--------|--------|-------|-----|--------------|-----|----|----|----|-------|---|-----|----|-------|----|
| B0043952 | 74 | F | 2018 | Prague           | 0.25  | 2 | 8  | >8    | 0.25 | ≤0.125 | 0.008  | 0.125 | >8  | >4           | 0.5 | 6  | 30 | 19 | t003  | 1 | 003 | -  | CC5   | -  |
| B0043954 | 76 | F | 2018 | Prague           | 0.125 | 1 | 4  | >8    | 0.25 | ≤0.125 | >0.5   | 0.125 | >8  | <b>0.125</b> | 0.5 | 6  | 30 | 18 | t003  | 1 | 003 | -  | CC5   | -  |
| B0043980 | 86 | F | 2018 | Karlovy Vary     | 0.125 | 2 | 8  | >8    | 0.25 | ≤0.125 | 0.008  | 0.125 | >8  | >4           | 0.5 | 6  | 30 | 20 | t003  | 1 | 003 | -  | CC5   | -  |
| B0043999 | 71 | M | 2018 | Karlovy Vary     | 0.25  | 2 | 8  | >8    | 0.5  | ≤0.125 | ≤0.004 | 0.125 | >8  | >4           | 0.5 | 6  | 28 | 17 | t586  | E | E   | -  | CC5   | -  |
| B0044001 | 88 | M | 2018 | Karlovy Vary     | 0.125 | 1 | 8  | >8    | 0.25 | 0.25   | ≤0.004 | 0.125 | >8  | >4           | 0.5 | 6  | 28 | 18 | t003  | 1 | 003 | -  | CC5   | -  |
| B0044015 | 89 | M | 2018 | Pilsen           | 0.25  | 2 | 8  | >8    | 0.5  | ≤0.125 | ≤0.004 | 0.125 | >8  | >4           | 0.5 | 6  | 28 | 21 | t014  | 1 | 003 | -  | CC5   | -  |
| B0044019 | 34 | M | 2018 | Pilsen           | 0.125 | 2 | 8  | 1     | 0.5  | ≤0.125 | 0.008  | 0.125 | 0.5 | 0.125        | 0.5 | 13 | 12 | 22 | t437  | S | S   | -  | CC59  | -  |
| B0044021 | 71 | M | 2018 | South Bohemian   | 0.125 | 1 | 4  | >8    | >8   | 2      | 0.008  | 0.25  | >8  | >4           | 0.5 | 6  | 29 | 17 | t586  | E | E   | -  | CC5   | -  |
| B0044022 | 64 | M | 2018 | South Bohemian   | 0.125 | 2 | 8  | >8    | 0.25 | ≤0.125 | >0.5   | 0.125 | >8  | >4           | 1   | 6  | 28 | 19 | t586  | E | E   | -  | CC5   | -  |
| B0044038 | 45 | F | 2018 | Central Bohemian | 0.25  | 2 | 8  | >8    | 0.5  | 0.25   | 0.008  | 2     | >8  | <b>0.25</b>  | 1   | 6  | 26 | 20 | t002  | 1 | 003 | -  | CC5   | -  |
| B0044043 | 70 | M | 2018 | South Bohemian   | 0.125 | 1 | 8  | >8    | >8   | 0.25   | ≤0.004 | 0.125 | >8  | >4           | 0.5 | 6  | 30 | 21 | t586  | E | E   | -  | CC5   | -  |
| B0044049 | 79 | M | 2018 | South Bohemian   | 0.125 | 1 | 4  | >8    | 0.25 | ≤0.125 | ≤0.004 | 0.125 | >8  | <b>0.125</b> | 0.5 | 10 | 33 | 20 | t014  | 1 | 003 | -  | CC5   | -  |
| B0044051 | 62 | M | 2018 | Prague           | 0.125 | 2 | 8  | >8    | 0.25 | ≤0.125 | 0.008  | 0.125 | >8  | >4           | 0.5 | 6  | 32 | 25 | t264  | 1 | 003 | -  | CC5   | -  |
| B0044088 | 59 | M | 2018 | Pardubice        | 0.25  | 2 | 8  | >8    | 0.25 | ≤0.125 | 0.008  | 0.125 | >8  | >4           | 0.5 | 9  | 29 | 20 | t014  | 1 | 003 | -  | CC5   | -  |
| B0044112 | 50 | M | 2018 | Pardubice        | 0.25  | 2 | 8  | >8    | 0.5  | 0.25   | 0.008  | 0.5   | >8  | >4           | 0.5 | 11 | 29 | 19 | t014  | 1 | 003 | -  | CC5   | -  |
| B0044114 | 76 | F | 2018 | South Bohemian   | 0.25  | 2 | 8  | >8    | 0.25 | 0.5    | 0.008  | 0.25  | >8  | >4           | 1   | 6  | 31 | 19 | t003  | 1 | 003 | -  | CC5   | -  |
| B0044135 | 66 | F | 2018 | South Bohemian   | 0.25  | 2 | 8  | >8    | 0.5  | ≤0.125 | 0.008  | 0.25  | >8  | >4           | 0.5 | 6  | 31 | 18 | t586  | E | E   | -  | CC5   | -  |
| B0044162 | 84 | F | 2018 | South Bohemian   | 0.25  | 2 | 8  | >8    | 0.5  | ≤0.125 | 0.008  | 0.25  | >8  | >4           | 0.5 | 7  | 10 | 20 | t003  | 1 | 003 | -  | CC5   | -  |
| B0044173 | 71 | M | 2018 | Prague           | 0.125 | 1 | 8  | >8    | 0.5  | 0.5    | ≤0.004 | 0.125 | >8  | >4           | 0.5 | 10 | 34 | 22 | t045  | 1 | 003 | -  | CC5   | -  |
| B0044221 | 79 | M | 2018 | Usti nad Labem   | 0.25  | 2 | 8  | >8    | 0.25 | ≤0.125 | 0.008  | 0.25  | >8  | >4           | 0.5 | 7  | 25 | 21 | t003  | 1 | 003 | -  | CC5   | -  |
| B0044232 | 74 | M | 2018 | Prague           | 0.25  | 2 | 8  | >8    | 0.5  | 0.25   | 0.008  | 0.25  | >8  | >4           | 0.5 | 6  | 26 | 19 | t003  | 1 | 003 | -  | CC5   | -  |
| B0044249 | 69 | M | 2018 | Prague           | 0.125 | 2 | 16 | >8    | 0.5  | 0.25   | 0.008  | 0.125 | >8  | >4           | 1   | 6  | 26 | 20 | t003  | 1 | 003 | -  | CC5   | -  |
| B0044257 | 70 | F | 2018 | Liberec          | 0.125 | 2 | 8  | >8    | 0.5  | ≤0.125 | ≤0.004 | 0.125 | >8  | >4           | 0.5 | 10 | 27 | 20 | t586  | E | E   | -  | CC5   | -  |
| B0044299 | 68 | F | 2018 | Usti nad Labem   | 0.25  | 2 | 8  | >8    | 0.5  | ≤0.125 | 0.008  | 0.25  | >8  | >4           | 0.5 | 6  | 25 | 20 | t003  | 1 | 003 | -  | CC5   | -  |
| B0044317 | 45 | F | 2018 | Prague           | 0.25  | 2 | 8  | >8    | 0.5  | 0.25   | 0.008  | >4    | >8  | <b>0.25</b>  | 1   | 6  | 27 | 17 | t002  | 1 | 003 | -  | CC5   | -  |
| B0044406 | 56 | F | 2018 | Olomouc          | 0.25  | 2 | 8  | >8    | 0.5  | ≤0.125 | 0.008  | 0.125 | >8  | >4           | 0.5 | 10 | 29 | 21 | t003  | 1 | 003 | -  | CC5   | -  |
| B0044410 | 71 | F | 2018 | Olomouc          | 0.25  | 2 | 8  | >8    | 0.5  | ≤0.125 | 0.008  | 0.125 | >8  | >4           | 0.5 | 6  | 28 | 20 | t003  | 1 | 003 | -  | CC5   | -  |
| B0044414 | 58 | F | 2018 | Prague           | 0.125 | 1 | 8  | >8    | >8   | 0.5    | ≤0.004 | 0.125 | >8  | >4           | 1   | 6  | 27 | 19 | t586  | E | E   | -  | CC5   | -  |
| B0044424 | 89 | F | 2018 | South Moravian   | 0.25  | 2 | 8  | >8    | 0.5  | ≤0.125 | 0.008  | 0.125 | >8  | >4           | 1   | 6  | 29 | 22 | t003  | 1 | 003 | -  | CC5   | -  |
| B0044428 | 87 | F | 2018 | Vysocina         | 0.25  | 2 | 8  | >8    | 0.5  | ≤0.125 | 0.008  | 0.125 | >8  | >4           | 0.5 | 10 | 27 | 23 | t014  | 1 | 003 | -  | CC5   | -  |
| B0044462 | 60 | M | 2018 | South Bohemian   | 0.125 | 2 | 8  | 0.125 | 0.25 | ≤0.125 | 0.008  | 0.25  | 0.5 | 0.25         | 1   | 13 | 25 | 22 | t1231 | 5 | NF  | 45 | CC45  | IV |
| B0044470 | 60 | F | 2018 | South Moravian   | 0.5   | 2 | 8  | 0.5   | 0.25 | 1      | 0.008  | 0.125 | >8  | >4           | 0.5 | 16 | 6  | 23 | t034  | 2 | 011 | -  | CC398 | -  |
| B0044508 | 44 | F | 2018 | South Bohemian   | 0.125 | 2 | 8  | >8    | 0.25 | ≤0.125 | 0.008  | 0.5   | >8  | >4           | 1   | 6  | 28 | 19 | t586  | E | E   | -  | CC5   | -  |
| B0044509 | 65 | F | 2018 | South Bohemian   | 0.25  | 2 | 16 | >8    | 0.5  | ≤0.125 | 0.008  | 0.25  | >8  | >4           | 1   | 6  | 23 | 20 | t586  | E | E   | -  | CC5   | -  |
| B0044559 | 56 | M | 2018 | Pilsen           | 0.25  | 2 | 8  | >8    | 0.5  | ≤0.125 | 0.008  | 0.125 | >8  | >4           | 0.5 | 6  | 26 | 18 | t014  | 1 | 003 | -  | CC5   | -  |
| B0044569 | 56 | M | 2018 | Hradec Kralove   | 0.25  | 2 | 8  | >8    | 0.5  | ≤0.125 | 0.008  | 0.25  | >8  | >4           | 0.5 | 8  | 24 | 19 | t003  | 1 | 003 | -  | CC5   | -  |
| B0044584 | 76 | F | 2018 | Prague           | 0.25  | 2 | 8  | 0.5   | 0.5  | 2      | 0.008  | 0.125 | >8  | >4           | 0.5 | 15 | 6  | 20 | t3275 | 2 | 011 | -  | CC398 | -  |
| B0044592 | 59 | M | 2018 | Pilsen           | 0.25  | 2 | 8  | >8    | 0.25 | ≤0.125 | 0.008  | 0.125 | >8  | >4           | 1   | 6  | 26 | 19 | t003  | 1 | 003 | -  | CC5   | -  |
| B0044602 | 73 | M | 2018 | Prague           | 0.125 | 1 | 8  | >8    | 0.25 | ≤0.125 | 0.008  | 0.125 | >8  | >4           | 0.5 | 6  | 28 | 22 | t003  | 1 | 003 | -  | CC5   | -  |
| B0044613 | 50 | M | 2018 | Prague           | 0.25  | 2 | 8  | >8    | 0.5  | ≤0.125 | 0.008  | 0.25  | >8  | >4           | 1   | 6  | 27 | 20 | t586  | E | E   | -  | CC5   | -  |

|          |    |   |      |                  |       |   |    |     |      |        |        |       |     |              |     |    |    |    |       |   |     |     |       |    |
|----------|----|---|------|------------------|-------|---|----|-----|------|--------|--------|-------|-----|--------------|-----|----|----|----|-------|---|-----|-----|-------|----|
| B0044663 | 76 | M | 2018 | Pardubice        | 0.25  | 2 | 16 | >8  | 0.5  | 0.25   | 0.008  | 0.25  | >8  | >4           | 0.5 | 6  | 30 | 21 | t003  | 1 | 003 | -   | CC5   | -  |
| B0044705 | 69 | F | 2018 | Prague           | 0.125 | 2 | 8  | >8  | 0.25 | 0.5    | 0.016  | 0.25  | >8  | >4           | 1   | 6  | 26 | 19 | t586  | E | E   | -   | CC5   | -  |
| B0044732 | 87 | F | 2018 | Karlovy Vary     | 0.125 | 2 | 8  | >8  | 0.5  | ≤0.125 | 0.008  | 0.125 | >8  | >4           | 0.5 | 6  | 29 | 19 | t003  | 1 | 003 | -   | CC5   | -  |
| B0044733 | 81 | F | 2018 | Karlovy Vary     | 0.25  | 2 | 8  | >8  | 0.5  | 0.25   | 0.008  | 0.25  | >8  | <b>0.25</b>  | 0.5 | 6  | 26 | 17 | t003  | 1 | 003 | -   | CC5   | -  |
| B0044843 | 75 | M | 2018 | South Moravian   | 0.25  | 2 | 8  | 0.5 | 0.25 | 0.5    | ≤0.004 | 0.06  | >8  | >4           | 1   | 16 | 8  | 21 | t034  | 2 | 011 | 398 | CC398 | V  |
| B0044846 | 91 | M | 2018 | Hradec Kralove   | 0.125 | 2 | 8  | >8  | 0.5  | ≤0.125 | 0.008  | 0.125 | >8  | >4           | 1   | 6  | 26 | 20 | t014  | 1 | 003 | -   | CC5   | -  |
| B0044857 | 80 | F | 2018 | Vysocina         | 0.25  | 2 | 8  | >8  | 0.25 | ≤0.125 | 0.008  | 0.125 | >8  | <b>0.125</b> | 1   | 6  | 27 | 20 | t014  | 1 | 003 | -   | CC5   | -  |
| B0044884 | 60 | M | 2018 | Prague           | 0.25  | 2 | 8  | 1   | 1    | ≤0.125 | 0.008  | 0.125 | >8  | <b>0.25</b>  | 1   | 12 | 30 | 20 | t010  | 1 | 003 | -   | CC5   | -  |
| B0044903 | 85 | M | 2018 | South Moravian   | 0.125 | 2 | 8  | >8  | 0.25 | ≤0.125 | 0.008  | 0.25  | >8  | >4           | 1   | 10 | 30 | 19 | t003  | 1 | 003 | -   | CC5   | -  |
| B0044949 | 78 | F | 2018 | South Moravian   | 0.25  | 2 | 8  | >8  | 0.5  | ≤0.125 | 0.008  | 0.25  | >8  | >4           | 1   | 6  | 30 | 21 | t003  | 1 | 003 | -   | CC5   | -  |
| B0044950 | 79 | M | 2018 | South Moravian   | 0.25  | 2 | 8  | >8  | 0.25 | ≤0.125 | 0.008  | 0.25  | >8  | >4           | 1   | 6  | 30 | 21 | t003  | 1 | 003 | -   | CC5   | -  |
| B0045007 | 76 | M | 2018 | Hradec Kralove   | 0.5   | 2 | 8  | 1   | 0.5  | 4      | 0.008  | 0.25  | >8  | >4           | 0.5 | 14 | 6  | 20 | t588  | 2 | 011 | -   | CC398 | -  |
| B0045015 | 66 | F | 2018 | Central Bohemian | 0.125 | 2 | 8  | >8  | 0.25 | ≤0.125 | ≤0.004 | 0.125 | >8  | >4           | 0.5 | 13 | 25 | 25 | t586  | E | E   | -   | CC5   | -  |
| B0045078 | 66 | M | 2018 | Prague           | 0.25  | 2 | 8  | >8  | 0.5  | ≤0.125 | 0.008  | 0.25  | >8  | >4           | 1   | 6  | 27 | 19 | t003  | 1 | 003 | -   | CC5   | -  |
| B0045098 | 60 | M | 2018 | Prague           | 0.25  | 4 | 8  | 1   | 0.5  | 0.25   | >0.5   | 0.125 | >8  | <b>0.25</b>  | 2   | 14 | 32 | 21 | t010  | 1 | 003 | -   | CC5   | -  |
| B0045137 | 83 | F | 2018 | Central Bohemian | 0.25  | 2 | 8  | >8  | 0.5  | ≤0.125 | 0.008  | 0.125 | >8  | <b>0.25</b>  | 1   | 6  | 28 | 19 | t002  | 1 | 003 | -   | CC5   | -  |
| B0045220 | 59 | M | 2018 | Pilsen           | 0.25  | 2 | 16 | >8  | 0.5  | ≤0.125 | 0.008  | 0.25  | >8  | >4           | 0.5 | 6  | 29 | 18 | t003  | 1 | 003 | -   | CC5   | -  |
| B0045251 | 64 | M | 2018 | Usti nad Labem   | 0.25  | 2 | 16 | >8  | 0.5  | ≤0.125 | 0.008  | 0.25  | >8  | >4           | 1   | 15 | 33 | 24 | t003  | 1 | 003 | -   | CC5   | -  |
| B0045310 | 84 | F | 2018 | Prague           | 0.25  | 2 | 8  | >8  | 0.25 | ≤0.125 | 0.008  | 0.125 | >8  | >4           | 1   | 6  | 27 | 18 | t586  | E | E   | -   | CC5   | -  |
| B0045322 | 52 | M | 2018 | Prague           | 0.125 | 2 | 8  | >8  | 0.5  | ≤0.125 | ≤0.004 | 0.125 | >8  | >4           | 1   | 6  | 29 | 18 | t586  | E | E   | -   | CC5   | -  |
| B0045326 | 83 | F | 2018 | Prague           | 0.25  | 2 | 8  | >8  | 0.5  | ≤0.125 | 0.008  | 0.125 | >8  | >4           | 0.5 | 6  | 28 | 18 | t586  | E | E   | -   | CC5   | -  |
| B0045336 | 0  | F | 2018 | Vysocina         | 0.25  | 2 | 8  | >8  | 0.5  | ≤0.125 | ≤0.004 | 0.125 | >8  | >4           | 1   | 6  | 29 | 19 | t586  | E | E   | -   | CC5   | -  |
| B0045342 | 0  | F | 2018 | Prague           | 0.25  | 2 | 8  | >8  | 0.5  | ≤0.125 | 0.016  | 0.25  | >8  | >4           | 1   | 6  | 28 | 18 | t586  | E | E   | -   | CC5   | -  |
| B0045349 | 0  | F | 2018 | Prague           | 0.25  | 2 | 8  | >8  | 0.5  | ≤0.125 | 0.008  | 0.125 | >8  | >4           | 1   | 6  | 26 | 17 | t586  | E | E   | -   | CC5   | -  |
| B0045443 | 80 | F | 2018 | Prague           | 0.25  | 2 | 8  | >8  | 0.5  | ≤0.125 | ≤0.004 | 0.125 | >8  | >4           | 1   | 6  | 27 | 18 | t586  | E | E   | -   | CC5   | -  |
| B0045477 | 76 | F | 2018 | Pilsen           | 0.125 | 2 | 8  | >8  | 0.25 | ≤0.125 | 0.008  | 0.125 | >8  | >4           | 0.5 | 6  | 29 | 18 | t003  | 1 | 003 | -   | CC5   | -  |
| B0045480 | 70 | M | 2018 | Pilsen           | 0.25  | 2 | 8  | >8  | 0.25 | ≤0.125 | 0.008  | 0.25  | >8  | >4           | 0.5 | 6  | 29 | 18 | t003  | 1 | 003 | -   | CC5   | -  |
| B0045519 | 89 | M | 2018 | Pardubice        | 0.125 | 1 | 4  | >8  | 0.25 | ≤0.125 | 0.008  | 0.125 | >8  | <b>0.125</b> | 1   | 6  | 34 | 21 | t014  | 1 | 003 | -   | CC5   | -  |
| B0045541 | 85 | F | 2018 | Prague           | 0.25  | 2 | 16 | >8  | >8   | 0.5    | 0.008  | 0.125 | >8  | >4           | 1   | 6  | 29 | 20 | t586  | E | E   | -   | CC5   | -  |
| B0045550 | 79 | M | 2018 | Usti nad Labem   | 0.125 | 2 | 8  | 0.5 | >8   | ≤0.125 | ≤0.004 | >4    | 0.5 | 0.125        | 1   | 16 | 28 | 21 | t4000 | S | S   | 72  | CC8   | nt |
| B0045585 | 69 | M | 2018 | South Bohemian   | 0.125 | 2 | 8  | >8  | >8   | 0.25   | ≤0.004 | 0.25  | >8  | >4           | 0.5 | 9  | 11 | 19 | t586  | E | E   | -   | CC5   | -  |
| B0045693 | 86 | M | 2018 | Pilsen           | 0.25  | 4 | 16 | >8  | 0.5  | 0.25   | 0.008  | 0.25  | >8  | >4           | 0.5 | 9  | 28 | 21 | t014  | 1 | 003 | -   | CC5   | -  |
| B0045843 | 86 | F | 2018 | South Bohemian   | 0.25  | 2 | 8  | >8  | >8   | 0.25   | ≤0.004 | 0.125 | >8  | >4           | 0.5 | 6  | 8  | 18 | t586  | E | E   | -   | CC5   | -  |
| B0045856 | 33 | F | 2018 | Prague           | 0.25  | 2 | 8  | >8  | 0.5  | ≤0.125 | 0.008  | 0.125 | >8  | >4           | 1   | 6  | 32 | 18 | t003  | 1 | 003 | -   | CC5   | -  |
| B0045883 | 59 | M | 2018 | South Moravian   | 0.125 | 2 | 8  | >8  | 0.5  | ≤0.125 | 0.008  | 0.25  | >8  | >4           | 1   | 9  | 30 | 19 | t003  | 1 | 003 | -   | CC5   | -  |
| B0045915 | 54 | M | 2018 | Pilsen           | 0.5   | 2 | 8  | >8  | 0.5  | 0.25   | ≤0.004 | 0.25  | >8  | >4           | 0.5 | 6  | 31 | 19 | t003  | 1 | 003 | -   | CC5   | -  |
| B0045953 | 63 | M | 2018 | Karlovy Vary     | 0.25  | 2 | 8  | >8  | 0.5  | ≤0.125 | 0.008  | 0.25  | >8  | >4           | 0.5 | 6  | 25 | 19 | t586  | E | E   | -   | CC5   | -  |
| B0045958 | 70 | M | 2018 | Karlovy Vary     | 0.125 | 2 | 8  | >8  | 0.25 | ≤0.125 | ≤0.004 | 0.125 | >8  | >4           | 0.5 | 6  | 27 | 17 | t003  | 1 | 003 | -   | CC5   | -  |
| B0045983 | 39 | M | 2018 | Pilsen           | 0.25  | 2 | 8  | >8  | 0.25 | ≤0.125 | 0.008  | 0.25  | >8  | >4           | 0.5 | 10 | 25 | 19 | t014  | 1 | 003 | -   | CC5   | -  |
| B0045994 | 79 | F | 2018 | South Moravian   | 0.25  | 2 | 8  | >8  | 0.5  | 0.25   | 0.008  | 0.25  | >8  | >4           | 1   | 6  | 30 | 20 | t003  | 1 | 003 | -   | CC5   | -  |

|          |    |   |      |                  |       |     |     |    |      |        |        |       |     |             |     |    |    |    |        |   |     |     |       |    |
|----------|----|---|------|------------------|-------|-----|-----|----|------|--------|--------|-------|-----|-------------|-----|----|----|----|--------|---|-----|-----|-------|----|
| B0046007 | 51 | M | 2018 | Prague           | 0.25  | 2   | 8   | >8 | >8   | >16    | 0.008  | 0.125 | 0.5 | 0.25        | 1   | 12 | 10 | 20 | t011   | 2 | 011 | 398 | CC398 | IV |
| B0046028 | 63 | M | 2018 | Prague           | 0.125 | 2   | 8   | >8 | 0.5  | ≤0.125 | ≤0.004 | 0.125 | >8  | >4          | 0.5 | 14 | 26 | 22 | t003   | 1 | 003 | -   | CC5   | -  |
| B0046149 | 36 | F | 2018 | Central Bohemian | 0.25  | 2   | 8   | 1  | >8   | ≤0.125 | 0.008  | 0.125 | >8  | >4          | 1   | 15 | 23 | 20 | t437   | S | S   | -   | CC59  | -  |
| B0046179 | 85 | F | 2018 | Central Bohemian | 0.25  | 2   | 8   | >8 | 0.5  | ≤0.125 | 0.008  | 0.25  | >8  | >4          | 1   | 6  | 29 | 17 | t014   | 1 | 003 | -   | CC5   | -  |
| B0046187 | 63 | M | 2018 | Central Bohemian | 0.25  | 2   | 8   | >8 | 0.5  | ≤0.125 | 0.008  | 0.125 | >8  | <b>0.25</b> | 1   | 6  | 28 | 18 | t002   | 1 | 003 | -   | CC5   | -  |
| B0046244 | 67 | M | 2018 | Olomouc          | 0.125 | 2   | 8   | >8 | 0.5  | ≤0.125 | ≤0.004 | 0.125 | >8  | >4          | 0.5 | 12 | 30 | 19 | t003   | 1 | 003 | -   | CC5   | -  |
| B0046249 | 71 | M | 2018 | Central Bohemian | 0.25  | 2   | 8   | >8 | 0.5  | ≤0.125 | ≤0.004 | 0.25  | >8  | <b>0.25</b> | 1   | 7  | 26 | 19 | t586   | E | E   | -   | CC5   | -  |
| B0046250 | 81 | M | 2018 | Central Bohemian | 0.125 | 2   | 8   | >8 | 0.5  | 0.25   | ≤0.004 | 0.125 | >8  | >4          | 0.5 | 14 | 28 | 23 | t003   | 1 | 003 | -   | CC5   | -  |
| B0046253 | 83 | M | 2018 | Prague           | 0.25  | 2   | 8   | >8 | 0.5  | >16    | 0.008  | 0.125 | >8  | >4          | 1   | 6  | 10 | 19 | t003   | 1 | 003 | -   | CC5   | -  |
| B0046333 | 71 | M | 2018 | Hradec Kralove   | 0.25  | 2   | 8   | >8 | 0.25 | ≤0.125 | 0.008  | 0.125 | >8  | >4          | 1   | 6  | 30 | 18 | t014   | 1 | 003 | -   | CC5   | -  |
| B0046342 | 69 | M | 2018 | Prague           | 0.125 | 2   | 8   | >8 | 0.5  | ≤0.125 | ≤0.004 | 0.125 | >8  | >4          | 1   | 10 | 26 | 18 | t014   | 1 | 003 | -   | CC5   | -  |
| B0046369 | 74 | M | 2018 | Prague           | 0.125 | 0.5 | 4   | >8 | 0.5  | ≤0.125 | ≤0.004 | ≤0.03 | >8  | 4           | 1   | 10 | 29 | 20 | t003   | 1 | 003 | -   | CC5   | -  |
| B0046370 | 65 | M | 2018 | Prague           | 0.25  | 2   | 8   | >8 | 0.5  | ≤0.125 | 0.008  | 0.25  | >8  | >4          | 1   | 10 | 26 | 25 | t003   | 1 | 003 | -   | CC5   | -  |
| B0046427 | 58 | F | 2018 | Prague           | 0.25  | 2   | 8   | >8 | >8   | ≤0.125 | 0.008  | >4    | 0.5 | 0.25        | 1   | 14 | 26 | 22 | t008   | 4 | 024 | -   | CC8   | -  |
| B0046428 | 77 | F | 2018 | Prague           | 0.125 | 1   | 8   | >8 | 0.25 | ≤0.125 | ≤0.004 | 0.06  | >8  | >4          | 0.5 | 12 | 26 | 19 | t003   | 1 | 003 | -   | CC5   | -  |
| B0046461 | 16 | M | 2018 | Prague           | 0.25  | 2   | 8   | >8 | >8   | 1      | 0.008  | 0.25  | >8  | >4          | 0.5 | 9  | 26 | 20 | t014   | 1 | 003 | -   | CC5   | -  |
| B0046495 | 87 | M | 2018 | Vysocina         | 0.125 | 2   | 8   | >8 | 0.5  | ≤0.125 | ≤0.004 | 0.125 | >8  | >4          | 1   | 10 | 28 | 18 | t003   | 1 | 003 | -   | CC5   | -  |
| B0046501 | 77 | F | 2018 | Prague           | 0.06  | 0.5 | 4   | >8 | 0.25 | ≤0.125 | ≤0.004 | ≤0.03 | >8  | >4          | 0.5 | 14 | 6  | 23 | t003   | 1 | 003 | -   | CC5   | -  |
| B0046529 | 72 | M | 2018 | Pardubice        | 0.25  | 2   | 8   | >8 | 0.5  | ≤0.125 | 0.008  | 0.125 | >8  | <b>0.25</b> | 1   | 8  | 23 | 18 | t18037 | 1 | 003 | -   | CC5   | -  |
| B0046563 | 48 | F | 2018 | South Bohemian   | 0.125 | 2   | 8   | >8 | 0.25 | ≤0.125 | 0.008  | 0.125 | >8  | >4          | 0.5 | 6  | 26 | 16 | t586   | E | E   | -   | CC5   | -  |
| B0046574 | 40 | M | 2018 | South Bohemian   | 0.25  | 2   | 8   | >8 | 0.25 | ≤0.125 | 0.008  | 0.125 | >8  | >4          | 1   | 6  | 29 | 19 | t586   | E | E   | -   | CC5   | -  |
| B0046579 | 64 | M | 2018 | South Bohemian   | 0.25  | 2   | 8   | >8 | 0.25 | ≤0.125 | 0.008  | 0.125 | >8  | >4          | 1   | 6  | 26 | 17 | t586   | E | E   | -   | CC5   | -  |
| B0046580 | 63 | M | 2018 | South Bohemian   | 0.25  | 2   | 8   | >8 | >8   | 0.25   | ≤0.004 | 0.125 | >8  | >4          | 0.5 | 6  | 9  | 18 | t586   | E | E   | -   | CC5   | -  |
| B0046723 | 68 | M | 2018 | Central Bohemian | 0.125 | 2   | 8   | >8 | >8   | 0.25   | ≤0.004 | 0.125 | >8  | >4          | 1   | 6  | 29 | 19 | t002   | 1 | 003 | -   | CC5   | -  |
| B0046743 | 84 | M | 2018 | Pardubice        | 0.25  | 2   | 8   | >8 | 1    | 0.25   | 0.03   | 0.25  | >8  | <b>0.25</b> | 0.5 | 8  | 28 | 20 | t014   | 1 | 003 | -   | CC5   | -  |
| B0046773 | 80 | F | 2018 | Zlin             | 0.125 | 1   | 4   | >8 | 1    | ≤0.125 | 0.008  | 0.5   | >8  | >4          | 1   | 12 | 30 | 22 | t003   | 1 | 003 | -   | CC5   | -  |
| B0046781 | 63 | M | 2018 | South Moravian   | 0.125 | 1   | 8   | >8 | 0.5  | ≤0.125 | ≤0.004 | ≤0.03 | >8  | >4          | 1   | 9  | 27 | 18 | t003   | 1 | 003 | -   | CC5   | -  |
| B0046794 | 29 | M | 2018 | Prague           | 0.25  | 2   | 64  | >8 | 1    | ≤0.125 | ≤0.004 | 0.125 | >8  | >4          | 1   | 6  | 28 | 18 | t586   | E | E   | -   | CC5   | -  |
| B0046816 | 86 | F | 2018 | Pardubice        | 0.25  | 2   | 16  | >8 | 0.5  | ≤0.125 | 0.008  | 0.125 | >8  | >4          | 1   | 6  | 25 | 20 | t003   | 1 | 003 | -   | CC5   | -  |
| B0046839 | 65 | M | 2018 | Central Bohemian | 0.25  | 2   | 8   | >8 | 0.5  | ≤0.125 | 0.008  | 0.25  | >8  | >4          | 1   | 7  | 26 | 18 | t586   | E | E   | -   | CC5   | -  |
| B0046862 | 93 | F | 2018 | Prague           | 0.125 | 1   | 8   | >8 | 0.5  | ≤0.125 | ≤0.004 | 0.06  | >8  | >4          | 1   | 8  | 27 | 19 | t014   | 1 | 003 | -   | CC5   | -  |
| B0046924 | 66 | F | 2018 | Usti nad Labem   | 0.25  | 2   | 8   | >8 | 0.5  | ≤0.125 | 0.008  | 0.125 | >8  | >4          | 1   | 6  | 25 | 18 | t003   | 1 | 003 | -   | CC5   | -  |
| B0047018 | 71 | M | 2018 | Prague           | 0.125 | 1   | 8   | >8 | 0.25 | ≤0.125 | ≤0.004 | 0.125 | >8  | >4          | 1   | 7  | 28 | 18 | t003   | 1 | 003 | -   | CC5   | -  |
| B0047063 | 50 | F | 2018 | Pilsen           | 0.25  | 2   | 8   | >8 | 0.5  | ≤0.125 | 0.008  | 0.25  | >8  | >4          | 1   | 6  | 28 | 18 | t003   | 1 | 003 | 225 | CC5   | II |
| B0047075 | 68 | M | 2018 | South Bohemian   | 0.125 | 2   | >64 | >8 | 0.5  | ≤0.125 | ≤0.004 | 0.125 | >8  | >4          | 1   | 12 | 26 | 20 | t586   | E | E   | -   | CC5   | -  |
| B0047090 | 78 | M | 2018 | Prague           | 0.25  | 2   | 8   | >8 | 0.5  | ≤0.125 | 0.008  | 0.25  | >8  | >4          | 1   | 6  | 27 | 17 | t586   | E | E   | -   | CC5   | -  |
| B0047127 | 51 | M | 2018 | Central Bohemian | 0.25  | 2   | 8   | >8 | 0.25 | ≤0.125 | 0.008  | 0.125 | >8  | <b>0.25</b> | 1   | 6  | 27 | 16 | t002   | 1 | 003 | -   | CC5   | -  |
| B0047151 | 75 | F | 2018 | Pardubice        | 0.125 | 2   | 8   | >8 | 0.5  | ≤0.125 | 0.008  | 0.125 | >8  | >4          | 0.5 | 9  | 25 | 18 | t014   | 1 | 003 | -   | CC5   | -  |
| B0047166 | 66 | M | 2018 | South Moravian   | 0.125 | 2   | 8   | >8 | 0.5  | 0.25   | 0.008  | 0.125 | >8  | >4          | 1   | 9  | 27 | 19 | t003   | 1 | 003 | -   | CC5   | -  |
| B0047175 | 74 | F | 2018 | Pilsen           | 0.25  | 2   | 8   | >8 | 0.5  | 0.25   | 0.008  | 0.25  | >8  | >4          | 1   | 9  | 27 | 19 | t003   | 1 | 003 | -   | CC5   | -  |

|          |    |   |      |                  |      |   |     |     |       |        |        |       |     |      |     |    |    |    |       |   |     |      |       |    |
|----------|----|---|------|------------------|------|---|-----|-----|-------|--------|--------|-------|-----|------|-----|----|----|----|-------|---|-----|------|-------|----|
| B0047178 | 74 | M | 2018 | Pilsen           | 0.25 | 2 | 16  | >8  | 0.5   | ≤0.125 | 0.008  | 1     | >8  | >4   | 1   | 6  | 25 | 20 | t014  | 1 | 003 | -    | CC5   | -  |
| B0047191 | 82 | M | 2018 | South Bohemian   | 0.25 | 2 | 8   | >8  | 0.25  | ≤0.125 | ≤0.004 | 0.125 | >8  | >4   | 1   | 6  | 26 | 18 | t586  | E | E   | -    | CC5   | -  |
| B0047229 | 50 | M | 2018 | Prague           | 0.5  | 2 | 8   | >8  | 2     | ≤0.125 | ≤0.004 | 0.25  | >8  | >4   | 0.5 | 8  | 30 | 19 | t003  | 1 | 003 | -    | CC5   | -  |
| B0047230 | 77 | M | 2018 | Prague           | 0.25 | 2 | 8   | >8  | 0.25  | ≤0.125 | ≤0.004 | 0.125 | >8  | >4   | 0.5 | 6  | 24 | 19 | t586  | E | E   | -    | CC5   | -  |
| B0047247 | 0  | M | 2018 | Prague           | 0.5  | 2 | 8   | >8  | 0.25  | ≤0.125 | ≤0.004 | 0.25  | >8  | >4   | 0.5 | 7  | 26 | 19 | t586  | E | E   | -    | CC5   | -  |
| B0047250 | 86 | F | 2018 | Prague           | 0.5  | 2 | 8   | >8  | 0.25  | ≤0.125 | ≤0.004 | 0.125 | >8  | >4   | 0.5 | 7  | 26 | 21 | t2379 | E | E   | 225  | CC5   | II |
| B0047286 | 78 | M | 2018 | Olomouc          | 0.25 | 2 | 8   | >8  | 0.125 | ≤0.125 | ≤0.004 | 0.125 | >8  | >4   | 0.5 | 8  | 28 | 19 | t003  | 1 | 003 | -    | CC5   | -  |
| B0047335 | 66 | F | 2018 | Pilsen           | 0.25 | 2 | 8   | >8  | 1     | ≤0.125 | ≤0.004 | 0.125 | >8  | >4   | 0.5 | 6  | 26 | 20 | t586  | E | E   | -    | CC5   | -  |
| B0047338 | 61 | M | 2018 | Pilsen           | 0.25 | 2 | 8   | >8  | 0.5   | ≤0.125 | ≤0.004 | 0.125 | >8  | >4   | 0.5 | 6  | 29 | 21 | t014  | 1 | 003 | -    | CC5   | -  |
| B0047341 | 66 | M | 2018 | Pilsen           | 0.25 | 2 | 8   | >8  | 0.25  | ≤0.125 | ≤0.004 | 0.125 | >8  | >4   | 0.5 | 6  | 27 | 20 | t003  | 1 | 003 | -    | CC5   | -  |
| B0047366 | 30 | M | 2018 | Liberec          | 0.25 | 2 | 8   | >8  | 0.25  | ≤0.125 | ≤0.004 | 0.125 | >8  | >4   | 0.5 | 6  | 30 | 20 | t014  | 1 | 003 | 225  | CC5   | II |
| B0047393 | 62 | F | 2018 | South Bohemian   | 0.5  | 2 | 16  | >8  | 0.25  | ≤0.125 | 0.008  | 0.25  | >8  | >4   | 0.5 | 7  | 31 | 20 | t003  | 1 | 003 | -    | CC5   | -  |
| B0047401 | 66 | M | 2018 | South Bohemian   | 0.5  | 2 | 8   | >8  | 0.5   | ≤0.125 | ≤0.004 | 0.125 | >8  | >4   | 1   | 6  | 30 | 19 | t586  | E | E   | -    | CC5   | -  |
| B0047402 | 89 | M | 2018 | South Bohemian   | 0.5  | 2 | 8   | >8  | 0.5   | ≤0.125 | 0.008  | 0.125 | >8  | >4   | 0.5 | 6  | 10 | 20 | t586  | E | E   | -    | CC5   | -  |
| B0047418 | 42 | F | 2018 | Usti nad Labem   | 0.5  | 2 | 8   | >8  | 0.5   | 0.25   | ≤0.004 | 0.125 | 1   | >4   | 1   | 17 | 7  | 21 | t034  | 2 | 011 | -    | CC398 | -  |
| B0047443 | 79 | F | 2018 | Prague           | 0.25 | 2 | 8   | >8  | 0.25  | ≤0.125 | ≤0.004 | 0.125 | >8  | >4   | 1   | 7  | 28 | 22 | t014  | 1 | 003 | -    | CC5   | -  |
| B0047455 | 60 | M | 2018 | Prague           | 0.5  | 2 | 16  | >8  | 0.5   | 0.25   | ≤0.004 | 0.125 | >8  | >4   | 1   | 7  | 30 | 19 | t586  | E | E   | -    | CC5   | -  |
| B0047500 | 62 | F | 2018 | South Bohemian   | 0.25 | 2 | 8   | >8  | 0.25  | ≤0.125 | ≤0.004 | 0.125 | >8  | >4   | 0.5 | 13 | 24 | 24 | t003  | 1 | 003 | -    | CC5   | -  |
| B0047516 | 77 | F | 2018 | Central Bohemian | 0.25 | 2 | 8   | >8  | 0.25  | ≤0.125 | ≤0.004 | 0.125 | >8  | >4   | 1   | 6  | 28 | 18 | t586  | E | E   | -    | CC5   | -  |
| B0047518 | 61 | F | 2018 | Central Bohemian | 0.25 | 2 | 8   | >8  | 0.25  | ≤0.125 | ≤0.004 | 0.125 | >8  | >4   | 1   | 10 | 27 | 25 | t586  | E | E   | -    | CC5   | -  |
| B0047548 | 88 | M | 2018 | Pilsen           | 0.5  | 4 | 16  | >8  | 0.25  | ≤0.125 | ≤0.004 | 0.125 | >8  | >4   | 1   | 9  | 27 | 19 | t014  | 1 | 003 | -    | CC5   | -  |
| B0047561 | 81 | M | 2018 | Vysocina         | 0.25 | 2 | 8   | >8  | 0.5   | ≤0.125 | ≤0.004 | 0.125 | >8  | >4   | 1   | 8  | 27 | 20 | t003  | 1 | 003 | -    | CC5   | -  |
| B0047608 | 68 | M | 2018 | Pardubice        | 0.25 | 2 | 8   | >8  | 1     | ≤0.125 | 0.008  | 0.125 | >8  | 0.25 | 1   | 9  | 27 | 19 | t003  | 1 | 003 | -    | CC5   | -  |
| B0047641 | 72 | M | 2018 | Prague           | 0.25 | 2 | >64 | >8  | >8    | ≤0.125 | ≤0.004 | 0.125 | >8  | >4   | 1   | 6  | 27 | 19 | t7657 | 1 | 003 | -    | CC5   | -  |
| B0047737 | 84 | F | 2018 | Vysocina         | 0.25 | 2 | 8   | >8  | 0.5   | ≤0.125 | ≤0.004 | 0.125 | >8  | >4   | 0.5 | 8  | 28 | 20 | t003  | 1 | 003 | -    | CC5   | -  |
| B0047770 | 58 | M | 2018 | Pardubice        | 0.25 | 2 | 8   | >8  | 0.5   | ≤0.125 | 0.008  | 0.125 | >8  | >4   | 1   | 8  | 27 | 19 | t014  | 1 | 003 | -    | CC5   | -  |
| B0047790 | 81 | M | 2018 | Prague           | 0.25 | 2 | 8   | >8  | 0.5   | 1      | ≤0.004 | 0.125 | >8  | >4   | 1   | 6  | 26 | 22 | t003  | 1 | 003 | -    | CC5   | -  |
| B0047833 | 74 | F | 2018 | Usti nad Labem   | 0.25 | 2 | 8   | >8  | 0.5   | ≤0.125 | 0.008  | 0.125 | >8  | >4   | 0.5 | 6  | 30 | 17 | t586  | E | E   | -    | CC5   | -  |
| B0047873 | 50 | F | 2018 | Karlovy Vary     | 0.25 | 2 | 8   | >8  | 0.25  | ≤0.125 | ≤0.004 | 0.125 | >8  | >4   | 0.5 | 11 | 28 | 19 | t045  | 1 | 003 | -    | CC5   | -  |
| B0047935 | 83 | F | 2018 | Central Bohemian | 0.25 | 2 | 8   | >8  | 0.5   | ≤0.125 | ≤0.004 | 0.125 | >8  | >4   | 0.5 | 10 | 25 | 18 | nt    | - | -   | -    | -     | -  |
| B0047998 | 59 | F | 2018 | Central Bohemian | 0.5  | 2 | 8   | >8  | 0.5   | ≤0.125 | ≤0.004 | 0.125 | >8  | >4   | 0.5 | 7  | 27 | 17 | t586  | E | E   | -    | CC5   | -  |
| B0047999 | 66 | F | 2018 | Central Bohemian | 0.5  | 2 | 16  | >8  | 0.25  | ≤0.125 | ≤0.004 | 0.125 | >8  | >4   | 0.5 | 7  | 26 | 17 | t586  | E | E   | -    | CC5   | -  |
| B0048037 | 85 | F | 2018 | Prague           | 0.25 | 2 | 8   | >8  | 0.5   | ≤0.125 | ≤0.004 | 0.125 | >8  | >4   | 0.5 | 9  | 26 | 18 | t003  | 1 | 003 | -    | CC5   | -  |
| B0048049 | 78 | F | 2018 | Pilsen           | 0.25 | 2 | 8   | >8  | 0.5   | ≤0.125 | ≤0.004 | 0.125 | >8  | >4   | 0.5 | 7  | 29 | 18 | t003  | 1 | 003 | -    | CC5   | -  |
| B0048051 | 21 | M | 2018 | South Moravian   | 0.5  | 2 | 8   | 1   | >8    | ≤0.125 | ≤0.004 | >4    | 0.5 | 0.25 | 1   | 18 | 10 | 20 | t084  | S | S   | 1535 | CC15  | V  |
| B0048070 | 85 | F | 2018 | South Bohemian   | 0.25 | 2 | 8   | >8  | 0.5   | ≤0.125 | ≤0.004 | 0.125 | >8  | >4   | 0.5 | 8  | 27 | 19 | t003  | 1 | 003 | -    | CC5   | -  |
| B0048099 | 73 | F | 2018 | Prague           | 0.25 | 2 | 8   | >8  | 0.25  | ≤0.125 | ≤0.004 | 0.125 | >8  | >4   | 0.5 | 6  | 31 | 19 | t586  | E | E   | -    | CC5   | -  |
| B0048151 | 58 | M | 2018 | Prague           | 0.25 | 2 | 8   | 0.5 | 0.5   | ≤0.125 | ≤0.004 | 0.125 | 1   | 0.25 | 1   | 12 | 29 | 21 | t359  | 6 | NF  | 97   | CC97  | IV |
| B0048320 | 47 | F | 2018 | Liberec          | 0.25 | 2 | 8   | >8  | 0.5   | ≤0.125 | ≤0.004 | 0.125 | >8  | >4   | 0.5 | 10 | 25 | 20 | t003  | 1 | 003 | -    | CC5   | -  |
| B0048363 | 79 | F | 2018 | Pilsen           | 0.5  | 4 | 8   | >8  | 0.25  | ≤0.125 | >0.5   | 0.125 | >8  | >4   | 1   | 7  | 25 | 23 | t893  | 1 | 003 | -    | CC5   | -  |



|          |    |   |      |                |      |   |   |    |      |        |        |       |    |    |     |   |    |    |      |   |     |   |     |   |
|----------|----|---|------|----------------|------|---|---|----|------|--------|--------|-------|----|----|-----|---|----|----|------|---|-----|---|-----|---|
| B0048389 | 68 | M | 2018 | Prague         | 0.25 | 2 | 8 | >8 | 0.5  | ≤0.125 | ≤0.004 | 0.125 | >8 | >4 | 1   | 6 | 28 | 17 | t586 | E | E   | - | CC5 | - |
| B0048442 | 85 | M | 2018 | South Moravian | 0.25 | 2 | 8 | >8 | 0.25 | 2      | ≤0.004 | 0.125 | >8 | >4 | 0.5 | 9 | 10 | 20 | t045 | 1 | 003 | - | CC5 | - |

male (M), female (F), non-typeable (nt), clonal complex (CC), sequence type (ST), excluded (E), singleton (S), no founder (NF), “-” (the isolate was not typed by the given method)

<sup>1</sup> antimicrobial susceptibility to tigecycline (TGC), linezolid (LNZ), chloramphenicol (CMP), ciprofloxacin (CIP), gentamicin (GEN), trimethoprim/sulfamethoxazole (SXT), rifampicin (RIF), fusidic acid (FUS), erythromycin (ERY), clindamycin (CLI), vancomycin (VAN), ceftazidime (FOX), tetracycline (TET) and ceftaroline (CPT) was tested either by microdilution or disc diffusion method

<sup>2</sup> inducible clindamycin resistance is highlighted in **bold**
